# Supplementary material for: Cross-platform comparison of immune signatures in immunotherapy-treated patients with advanced melanoma using a rank-based scoring approach
Source: PubMed Central journal article supplement (PMC10103529; doi:10.1186/s12967-023-04092-9), 2023-04-13
Supplement: 12967_2023_4092_MOESM1_ESM.pdf [file 12967_2023_4092_MOESM1_ESM.pdf]

## Additional file

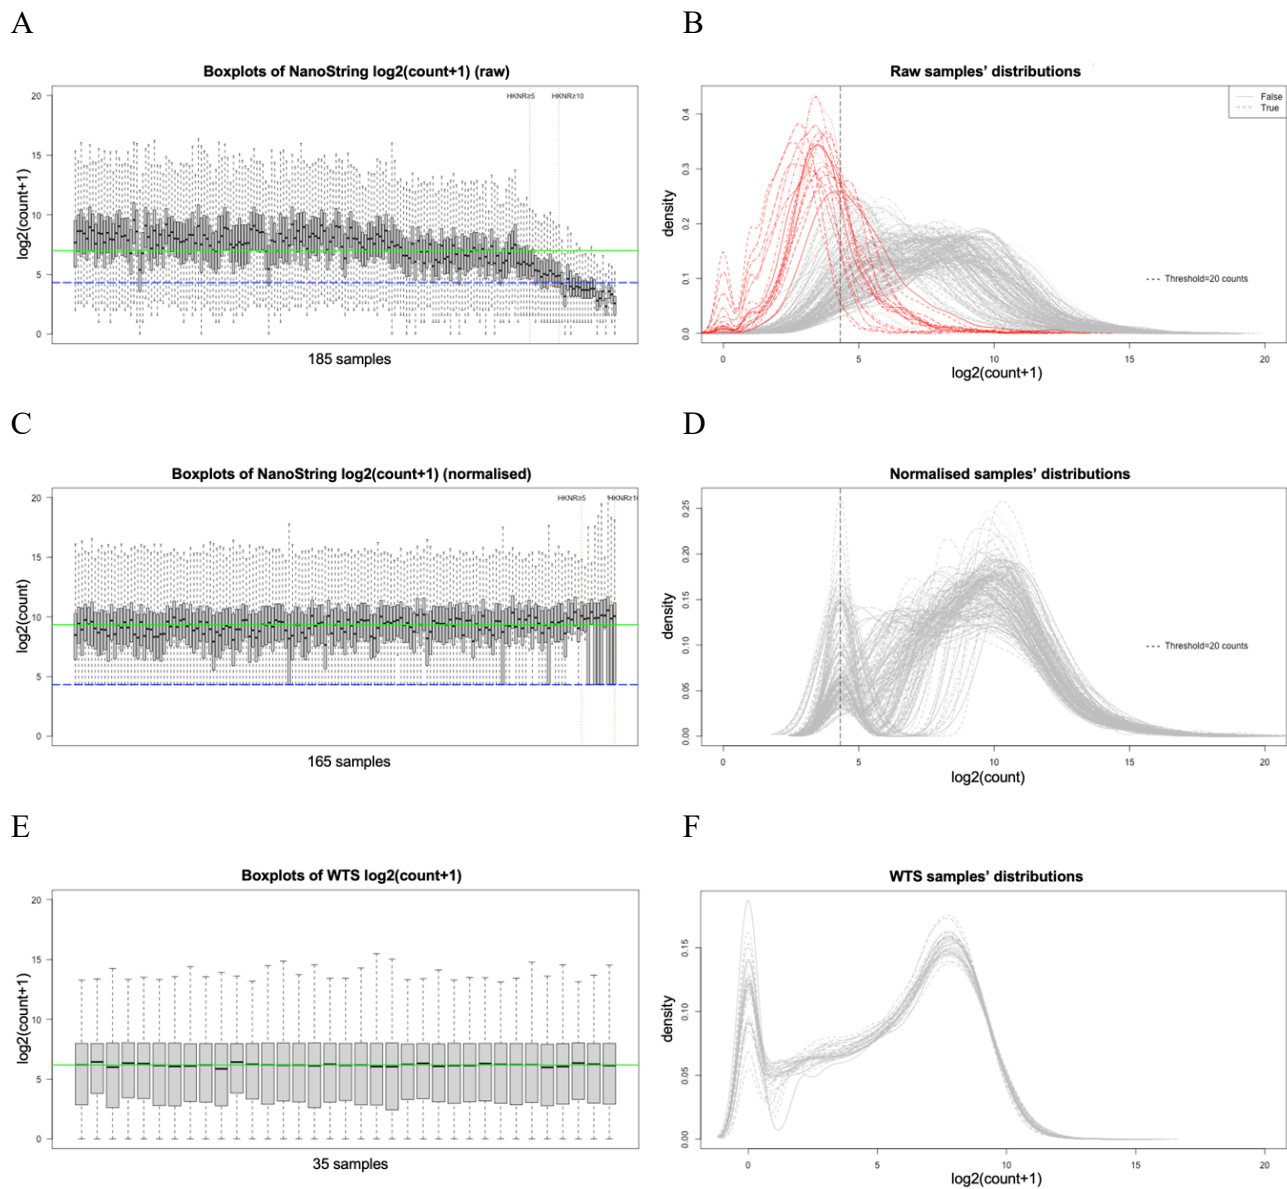

**Figure S1. Distribution plots of NanoString and WTS samples.** (A-D) Sample distribution plots on NanoString expression data. (E-F) Sample distribution plots on WTS expression data. (A,C,E) Each boxplot represents one sample. The y-axis is  $\log_2$ -transformed count values. The horizontal green line represents the median expression value across all samples. The horizontal blue dashed line is  $\log_2(20)$ , which is defined as background noise in NanoString data. The two vertical dotted lines stand for housekeeping gene normalisation ratio  $\geq 5$  (left) and  $\geq 10$  (right). Samples in NanoString boxplots are ordered by the housekeeping gene normalisation ratio in an ascending order from the left to the right. (A) Boxplot on raw NanoString expression data. (C) Boxplot on normalised NanoString expression data. (E) Boxplot on WTS expression data. (B,D,F) Each curve represents one sample. The x-axis is  $\log_2$  transformed count values. The vertical black dashed line is  $\log_2(20)$ . (B) Line plot on raw NanoString expression data. The red lines represent samples with housekeeping gene normalisation ratio  $\geq 10$ . (D) Line plot on normalised NanoString expression data. Sample with housekeeping gene normalisation ratio  $\geq 10$  already filtered out. (F) Line plot on WTS expression data.

A

### Heatmaps 185 samples no ERCC probes with Panel standards

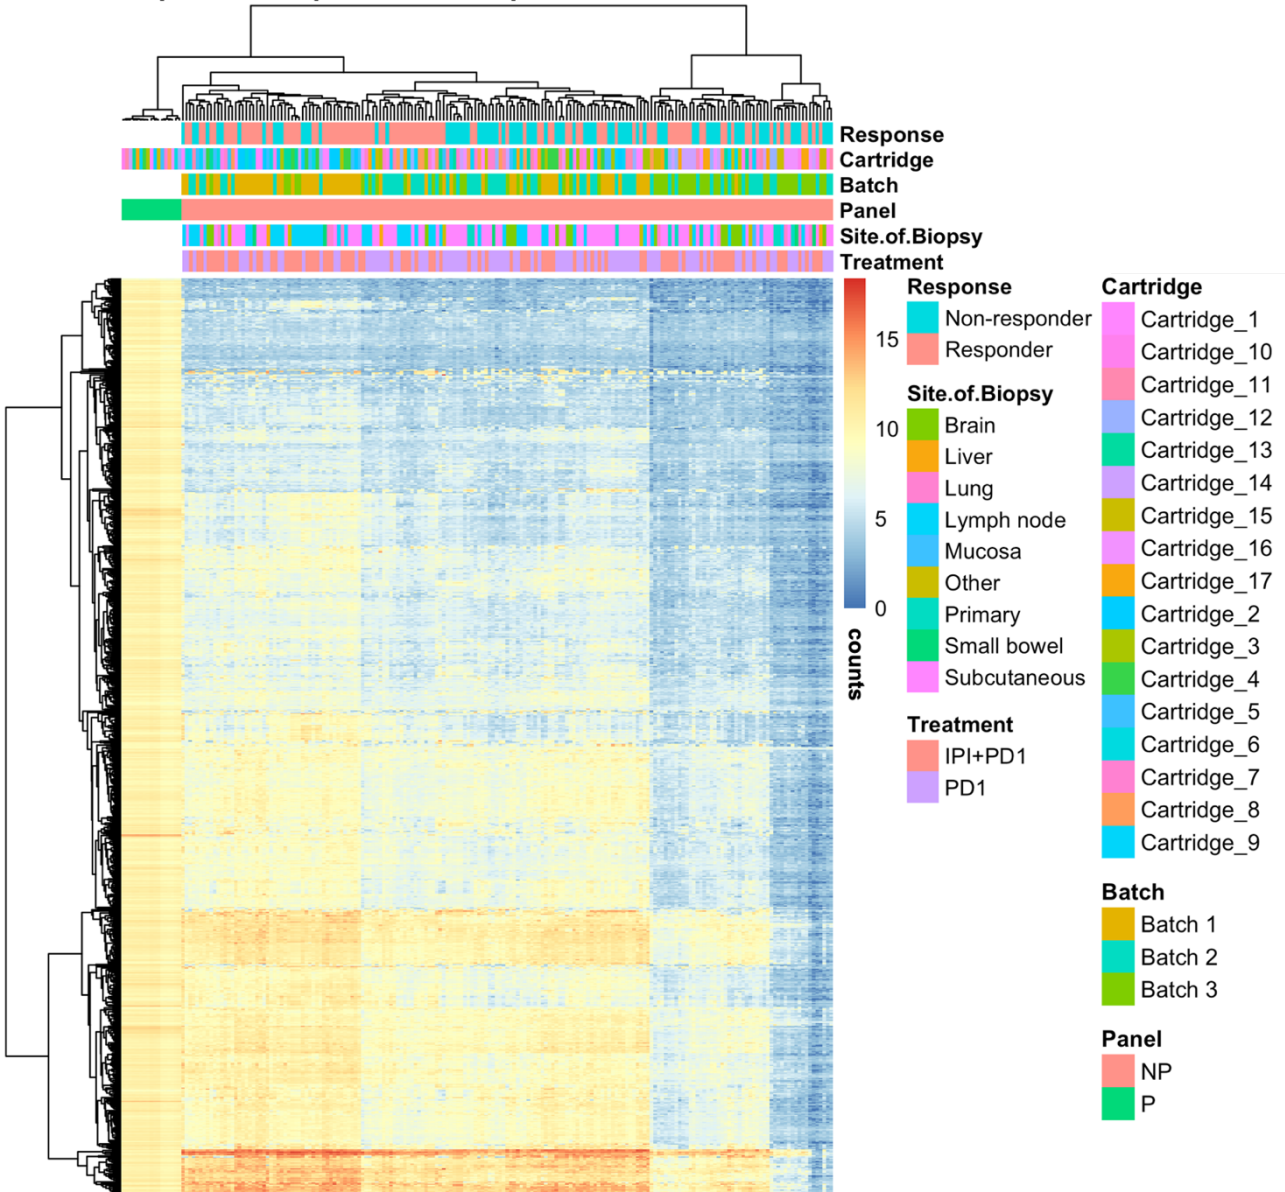

B

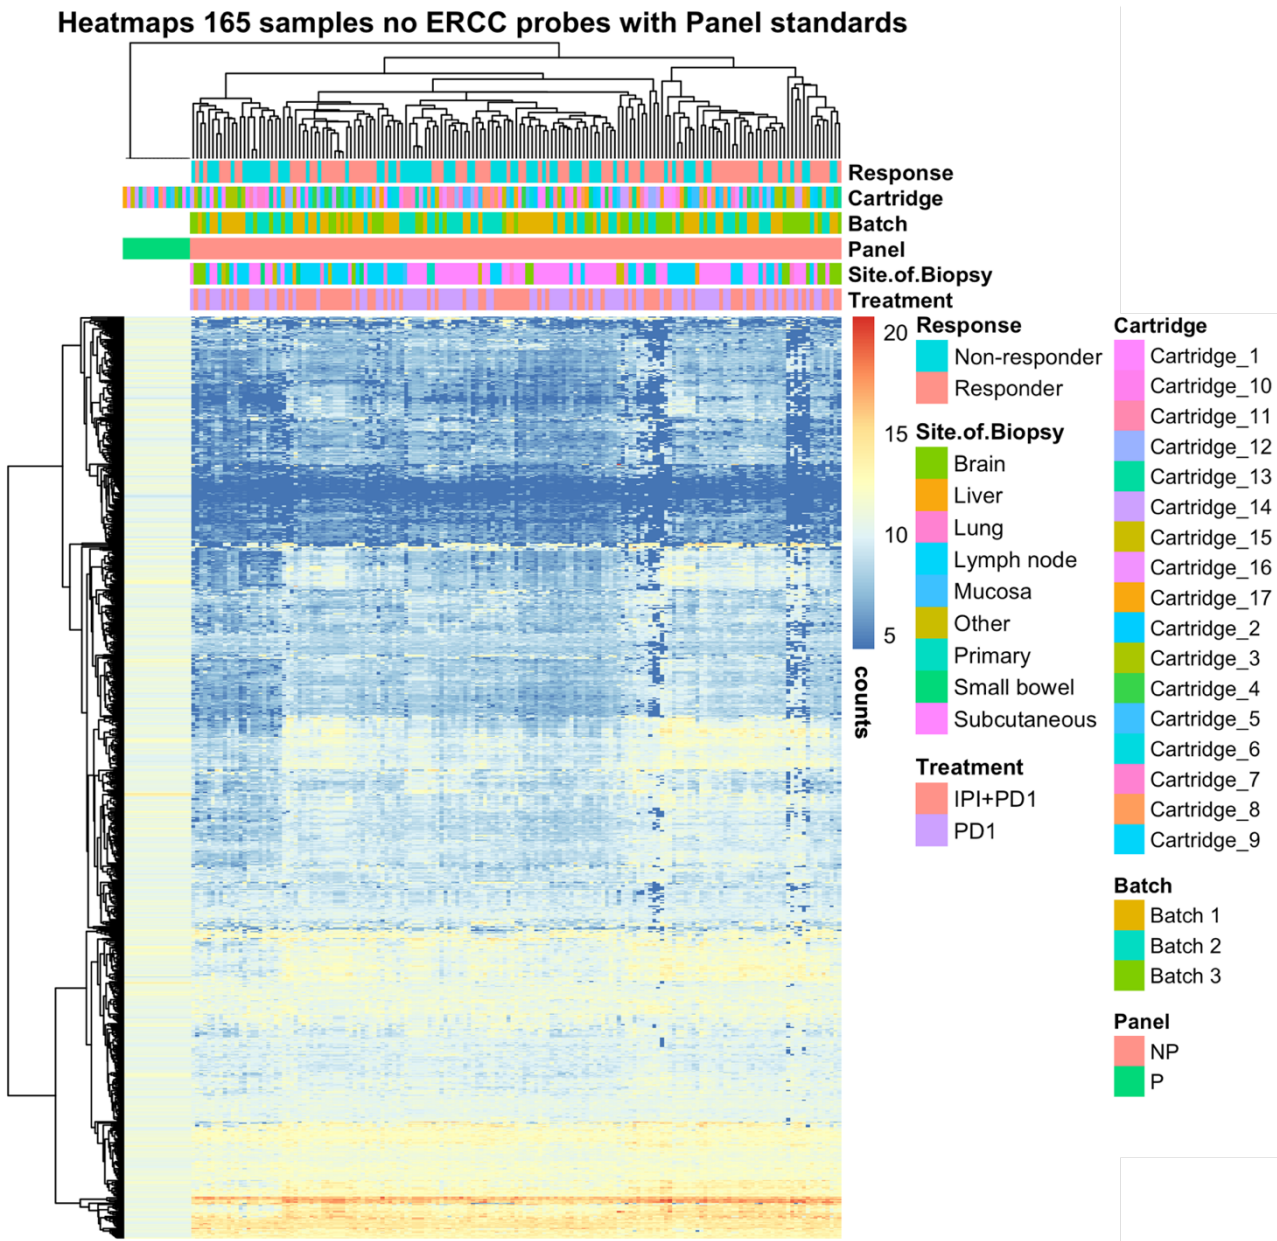

**Figure S2. Heatmap of NanoString counts.** The heatmap shows the samples' raw counts. Hierarchical clustering group on samples (columns) and genes (rows). Clinical features are labelled for each sample. "NP" and "P" in Panel category distinguish sample count and Panel standard count. 14 Engineered RNA sequences (ERCC) probes (6 positive controls and 8 negative controls) were removed, and only mRNA probes were kept in this figure. The color bar is based on the  $\log_2$ -transformed count values. (A) 185 samples' raw counts. (B) 165 samples' normalised counts.

A

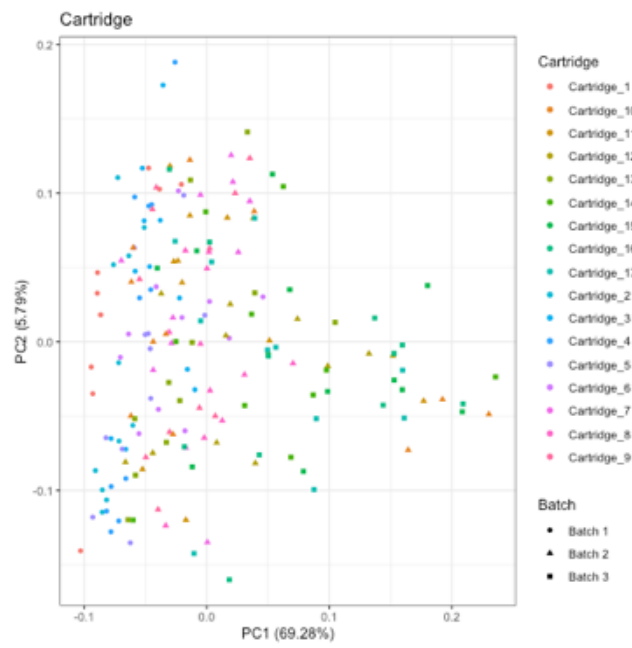

B

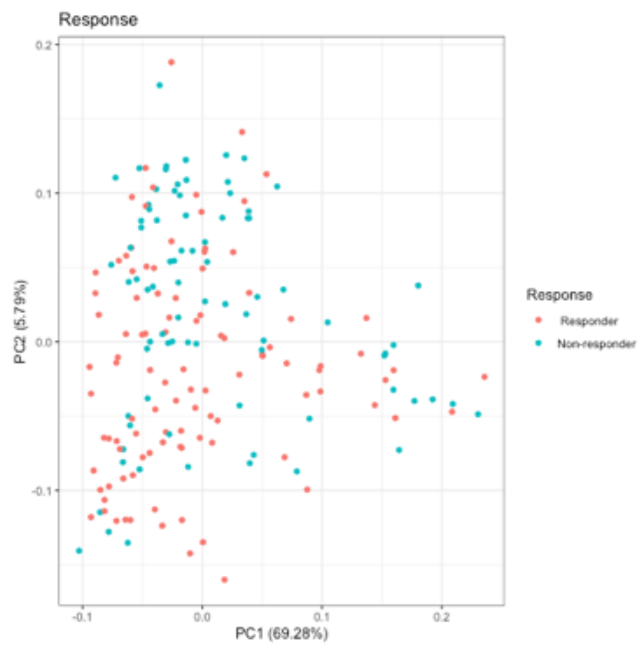

C

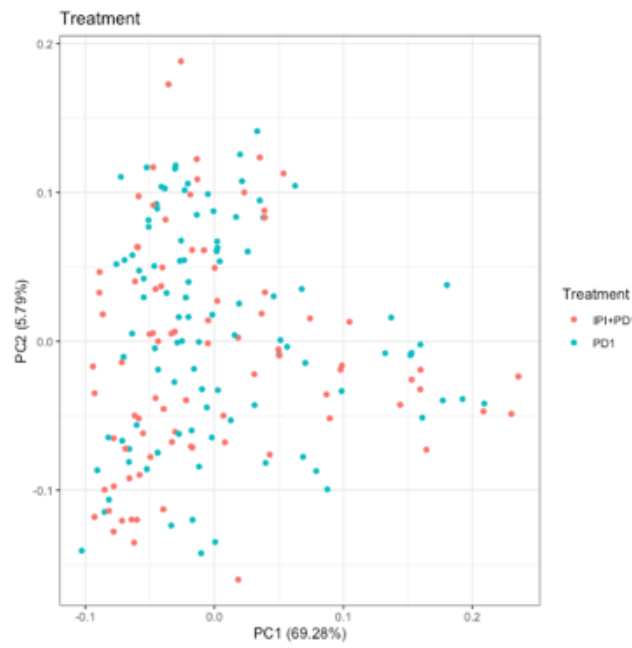

D

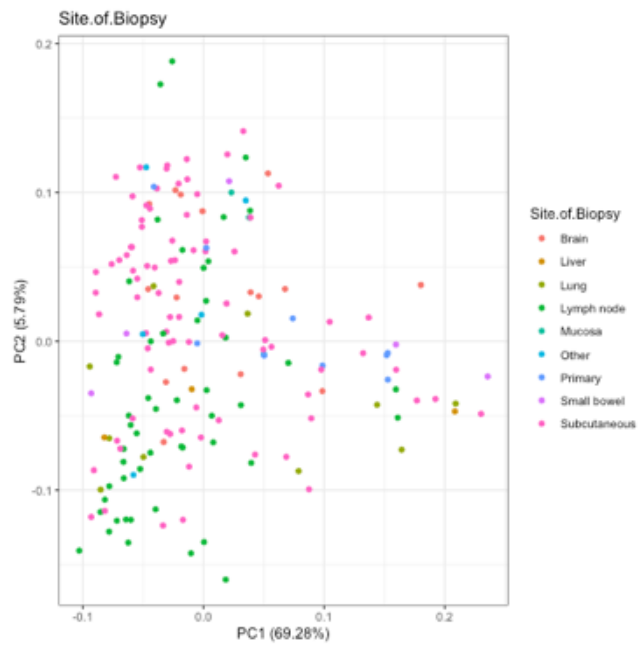

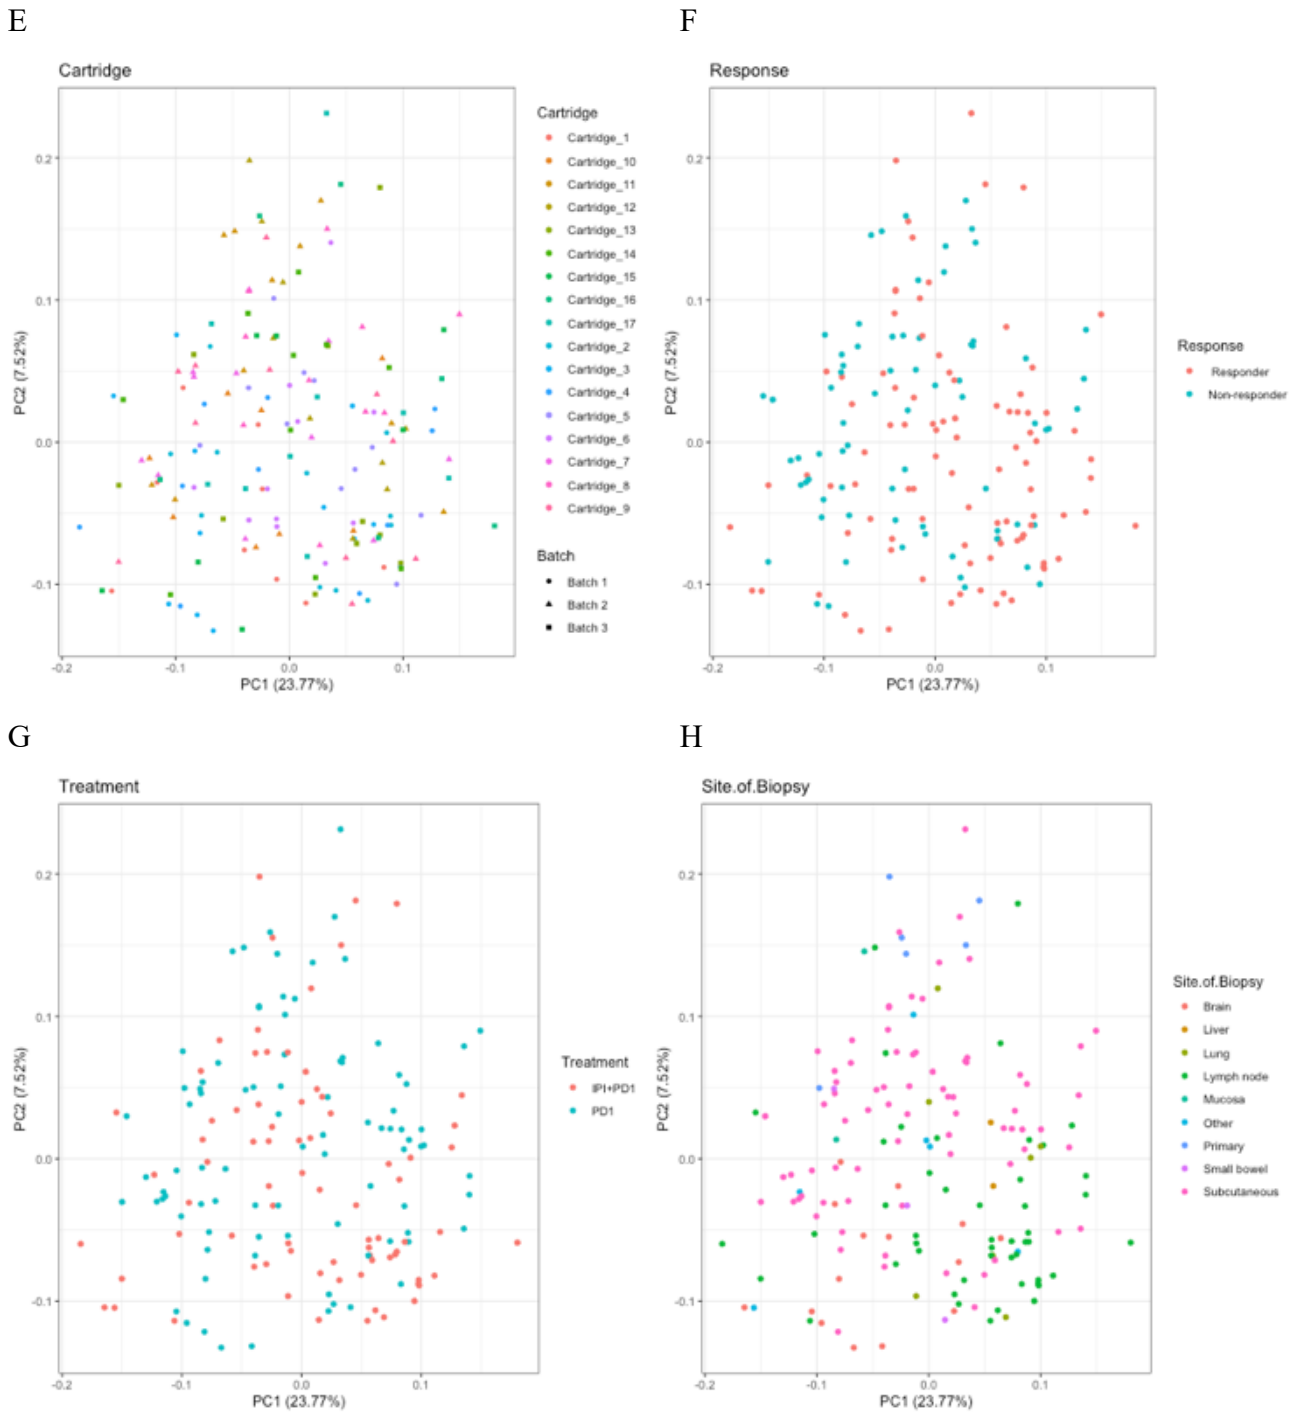

**Figure S3. PCA plots on 165 NanoString samples. (A-D)** on the raw counts data. **(E-H)** on the normalised counts data. **(A, E)** samples are colored by cartridges, and labelled by batches. **(B, F)** samples are colored by response status. **(C, G)** samples are colored by immunotherapies. **(D, H)** samples are colored by the sites of biopsy.

A

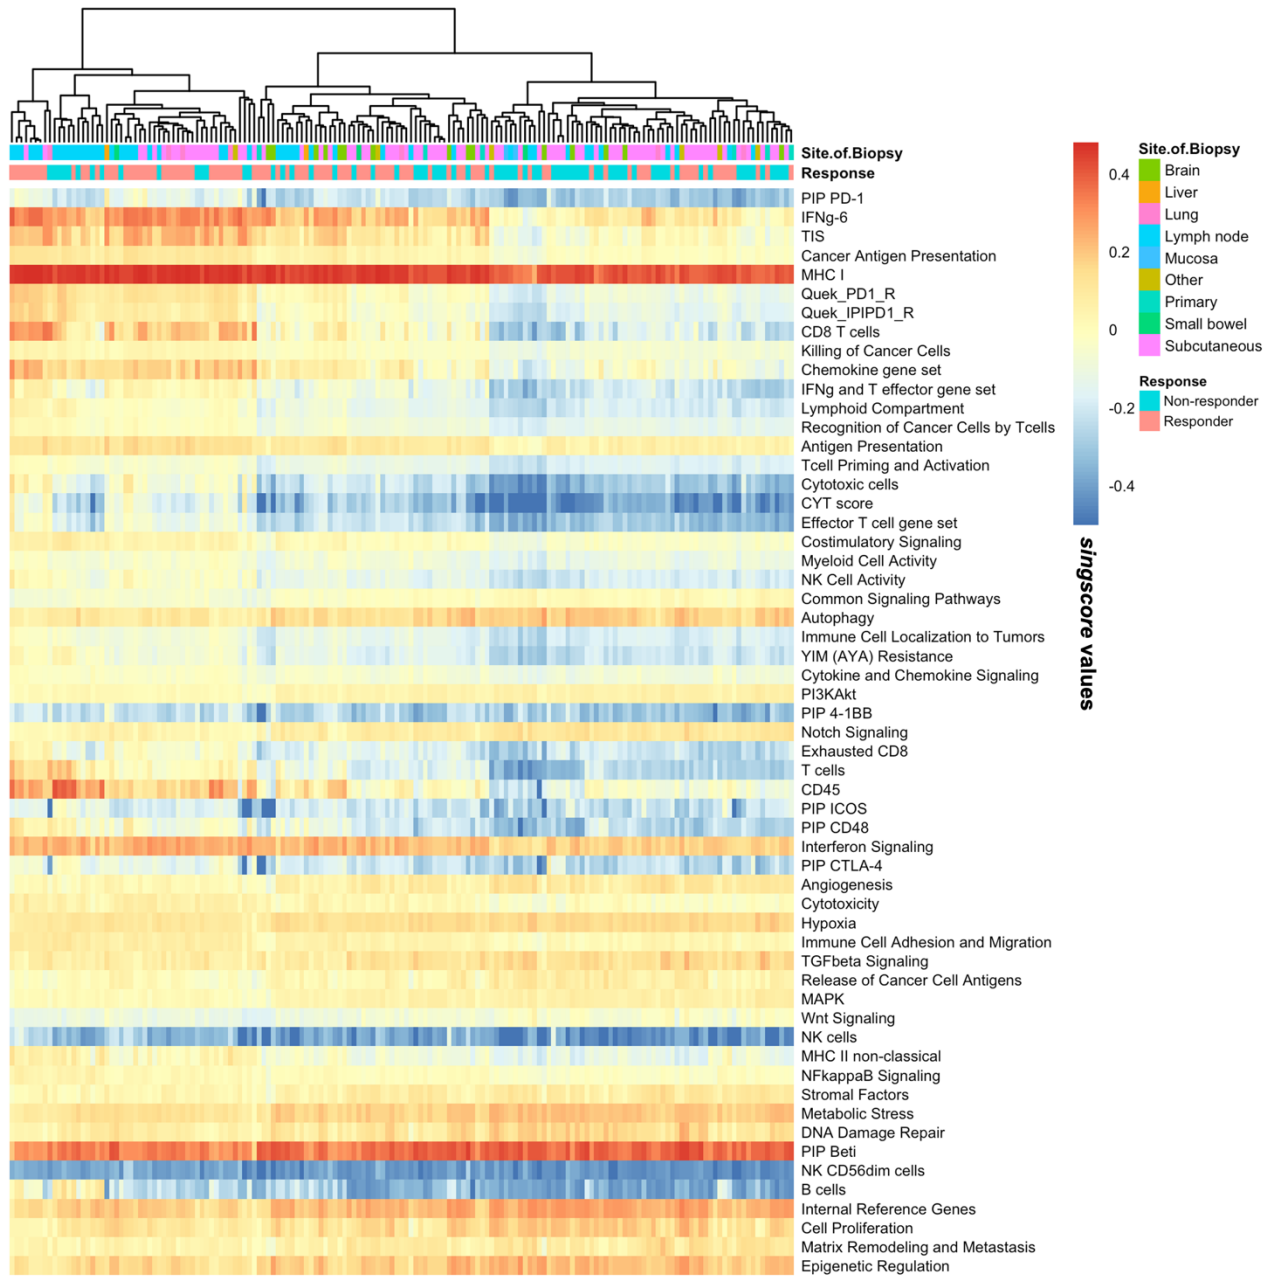

B

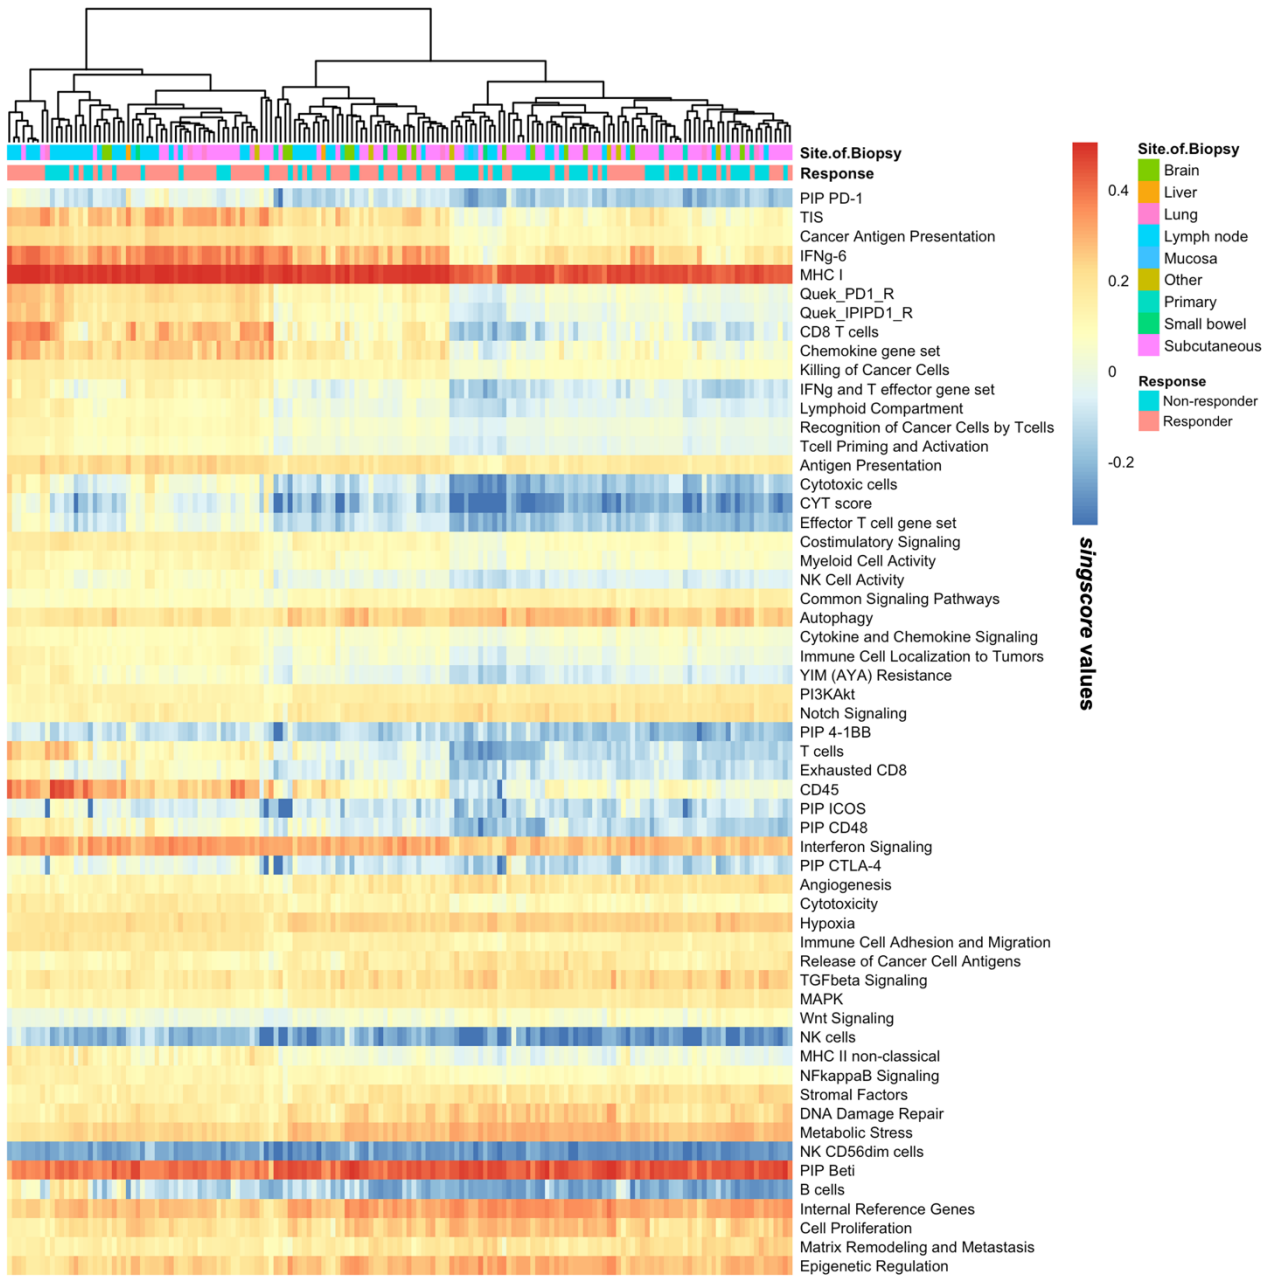

C

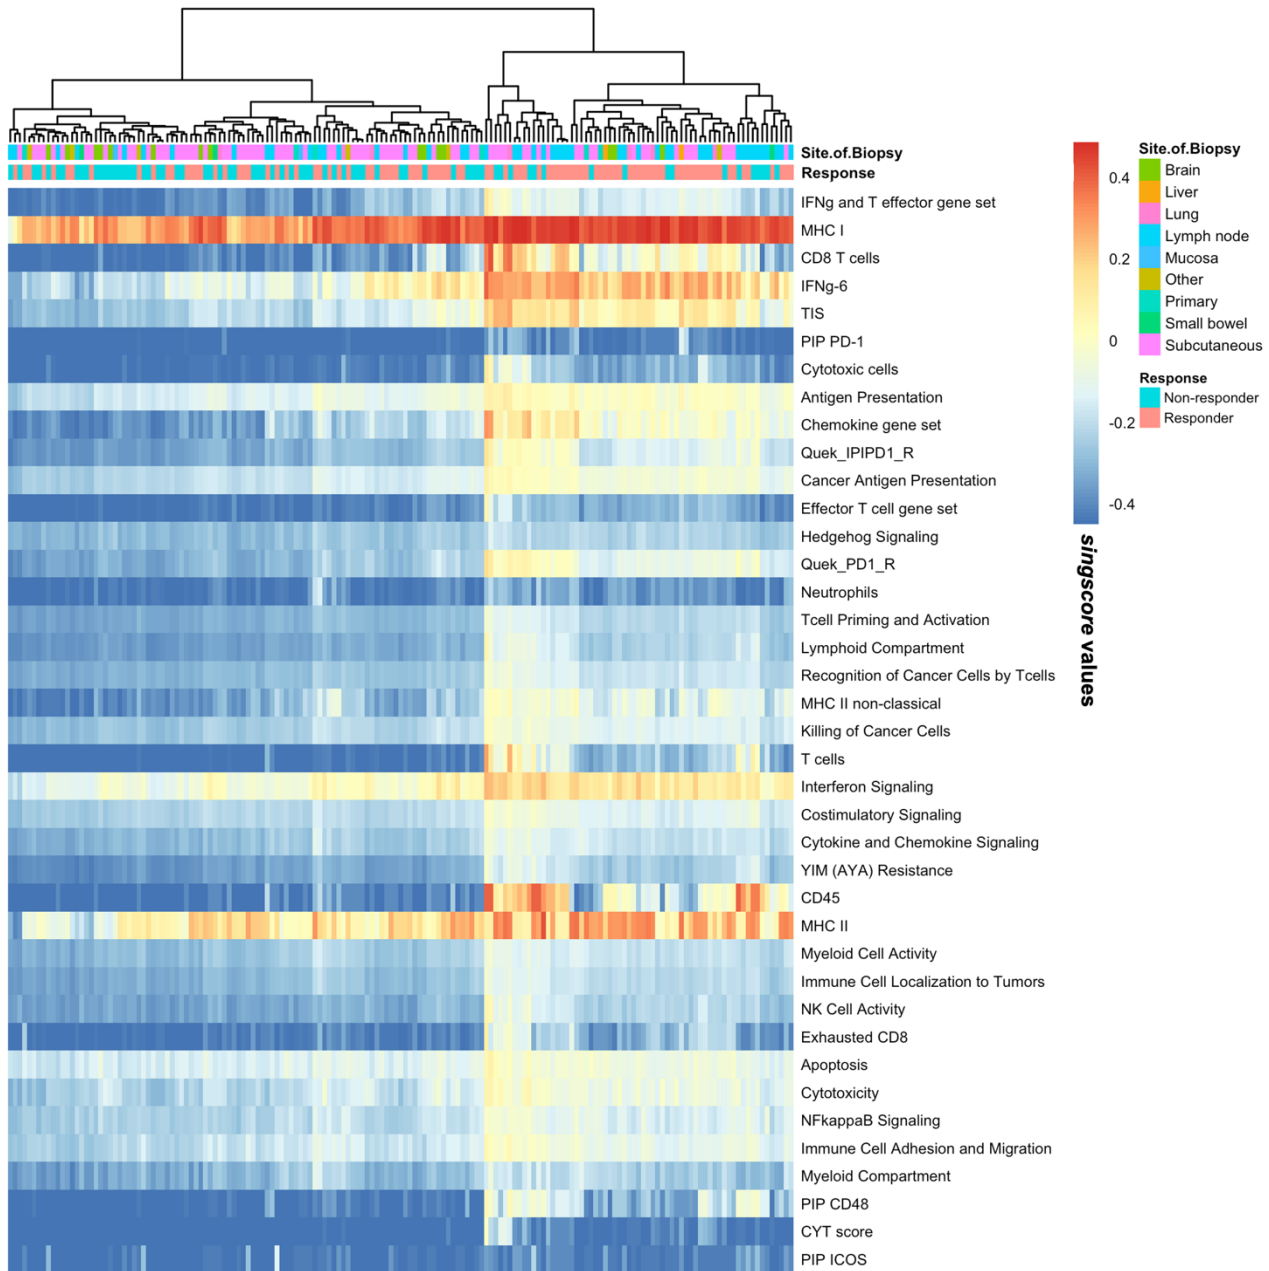

**Figure S4. Heatmap of significant signatures.** The signatures listed in each plot passed the FDR (*BH* adjustment on *Mann Whitney Wilcoxon* test p-values)  $\leq 0.05$  threshold and were ranked by FDR values in an ascending order from the top to the bottom. The color bar is based on the *singscores* ' values. **(A)** *singscores* calculated by the “No stable gene” method. Based on the top 3 clusters, hierarchal clustering correctly classified 73.4% (69/94) responders (left and middle clusters) and 54.9% (39/71) non-respond (right cluster). **(B)** *singscores* calculated by the “Skewed ranks” method. Based on the top 3 clusters, hierarchal clustering correctly classified 71.3% (67/94) responders (left and middle clusters) and 63.4% (45/71) non-respond (right cluster). **(C)** *singscores* calculated by the “HK genes” method. Based on the top 2 clusters, hierarchal clustering correctly classified 51.1% (48/94) responders (right cluster) and 76.1% (54/71) non-respond (left cluster).



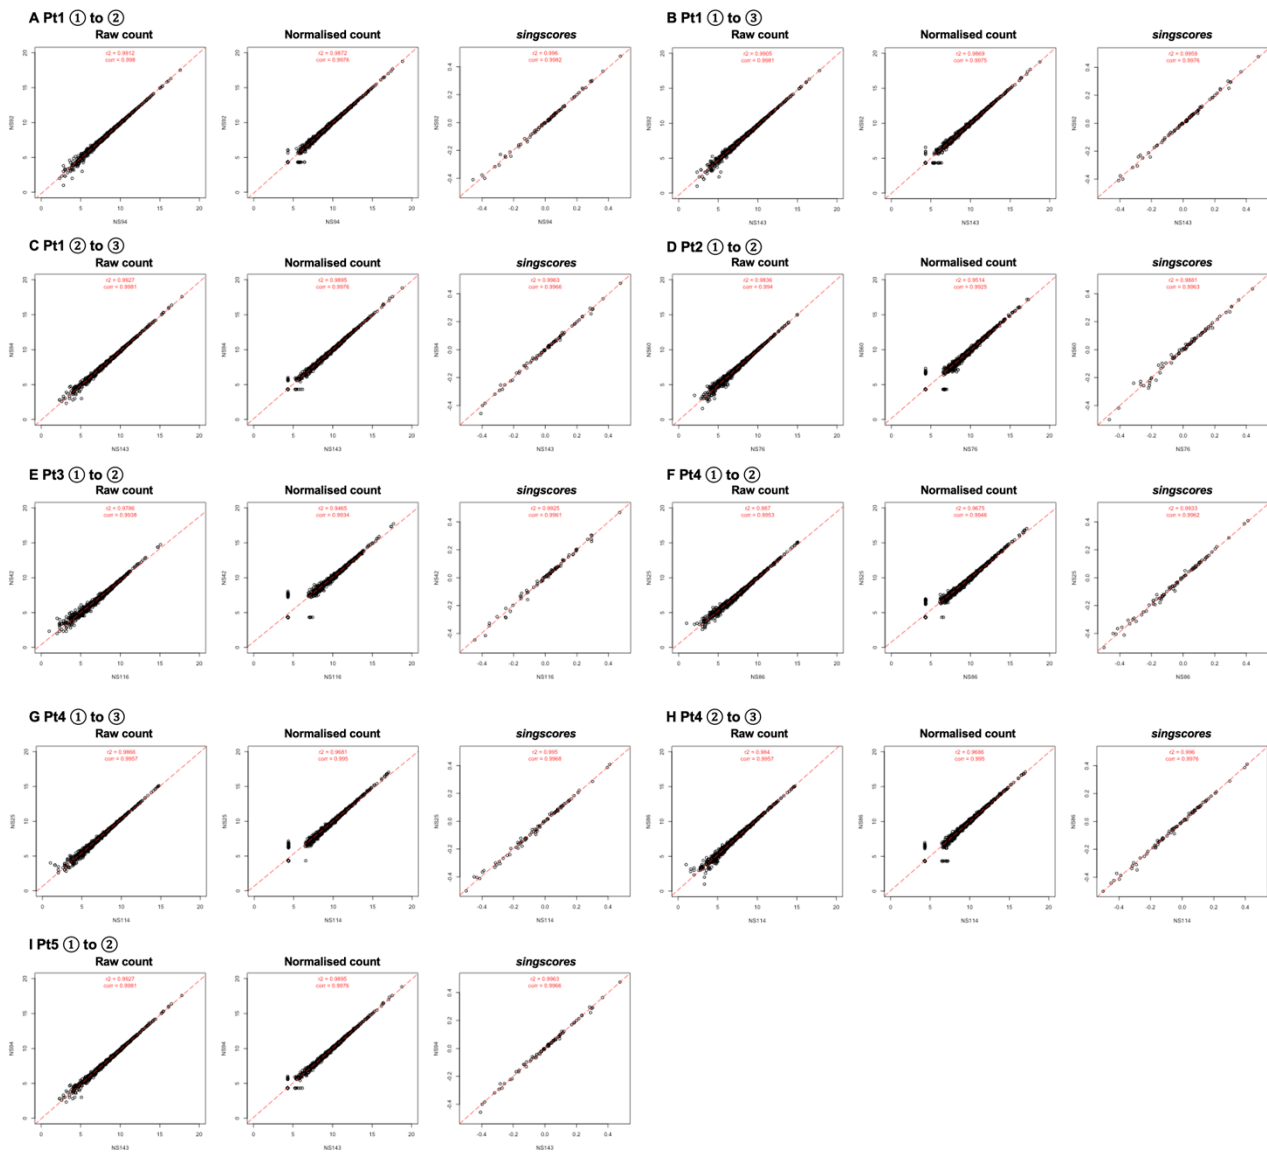

**Figure S5. Linear regression plots among repeated samples.** Each sub-plot has the Patient ID number which can map to Fig. 3A. Right plot: raw counts. Middle plot: normalised counts. Left plot: *singscores* of 81 signatures calculated from the “No stable gene” method. The diagonal red dashed line is the regression line when the *singscores* are identical between repeats.

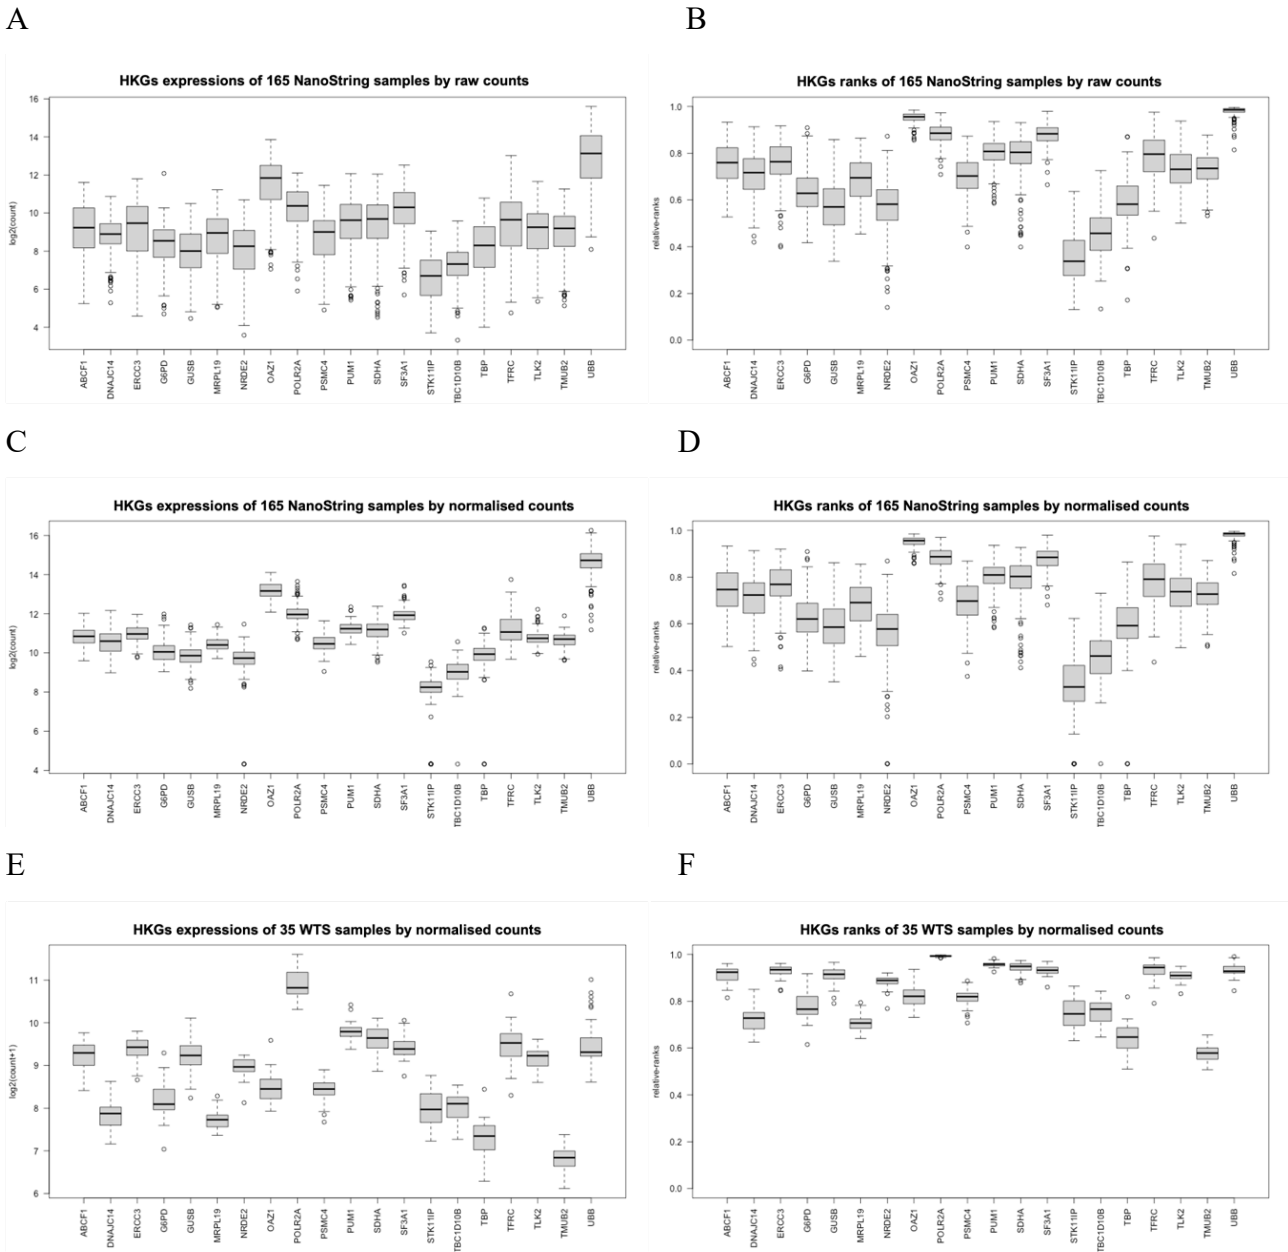

**Figure S6. 20 Housekeeping gene expressions and ranks on NanoString and WTS platforms. (A, C, E)** Boxplots of 20 housekeeping gene expressions in  $\log_2$ -transformed count. **(B, D, F)** Boxplots of 20 housekeeping gene expression-relative ranks. The gene ranks were standardised by 770 in NanoString and by 22297 in WTS. **(A, B)** NanoString raw counts. **(C, D)** NanoString normalised counts. **(E, F)** WTS normalised counts.

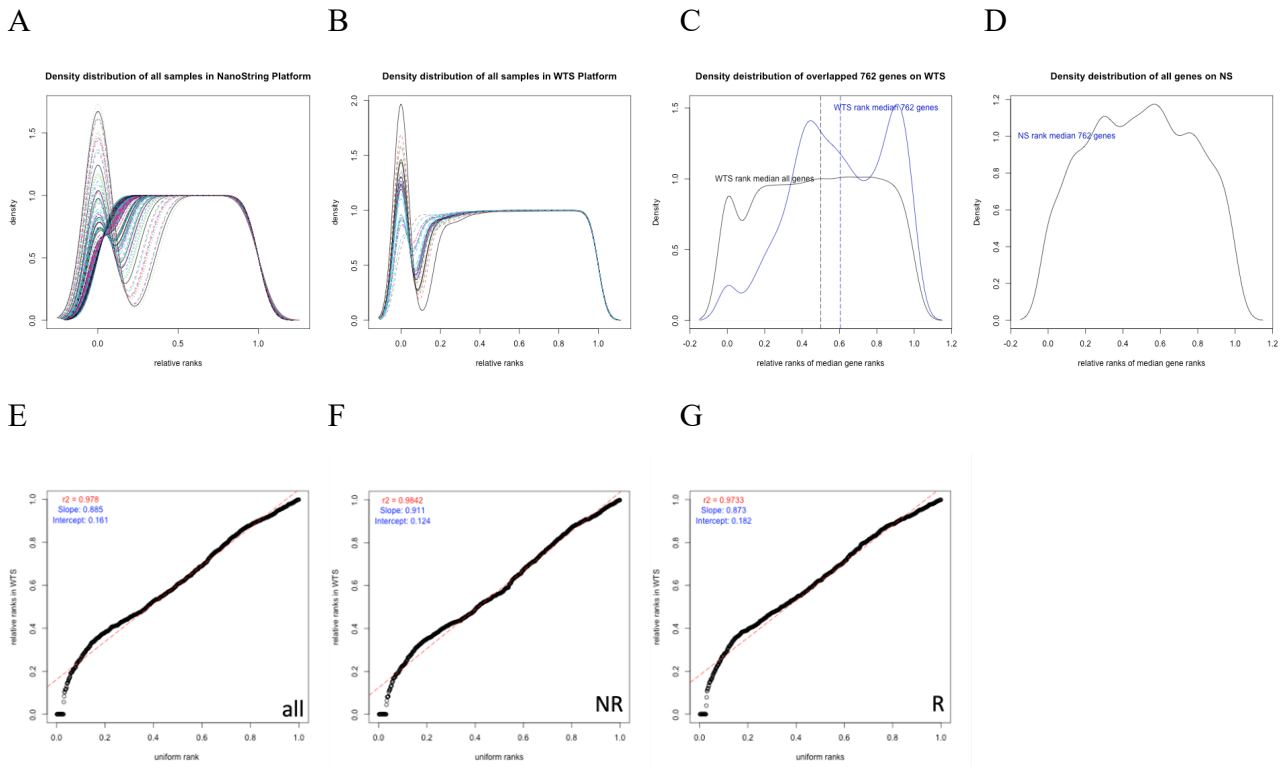

**Figure S7. rank distributions.** (A, B) Density plot on ranks per sample. (A) 165 NanoString samples with relative ranks (standardised by 770). (B) 35 WTS samples relative ranks (standardised by 22297). (C, D) Density plot on median ranks. (C) The black curve shows the density of relative median ranks (standardised by 22297) in all 22297 genes in WTS platform. The vertical black dashed line is the median of relative median ranks among 22297 genes. The blue curve shows the density of relative median ranks (standardised by 22297) in overlapping 762 genes in WTS platform. The vertical blue dashed line is the median of relative median ranks among 762 genes. (D) The curve shows the density of relative median ranks (standardised by 770) in overlapping 762 genes in NanoString (NS) platform. (E-G) Linear regression of median gene ranks in overlapping 762 genes from WTS platform against a uniform distributed rank 1:762. (E) using all 35 samples. (F) using non-responders only. (G) using responders only.

A

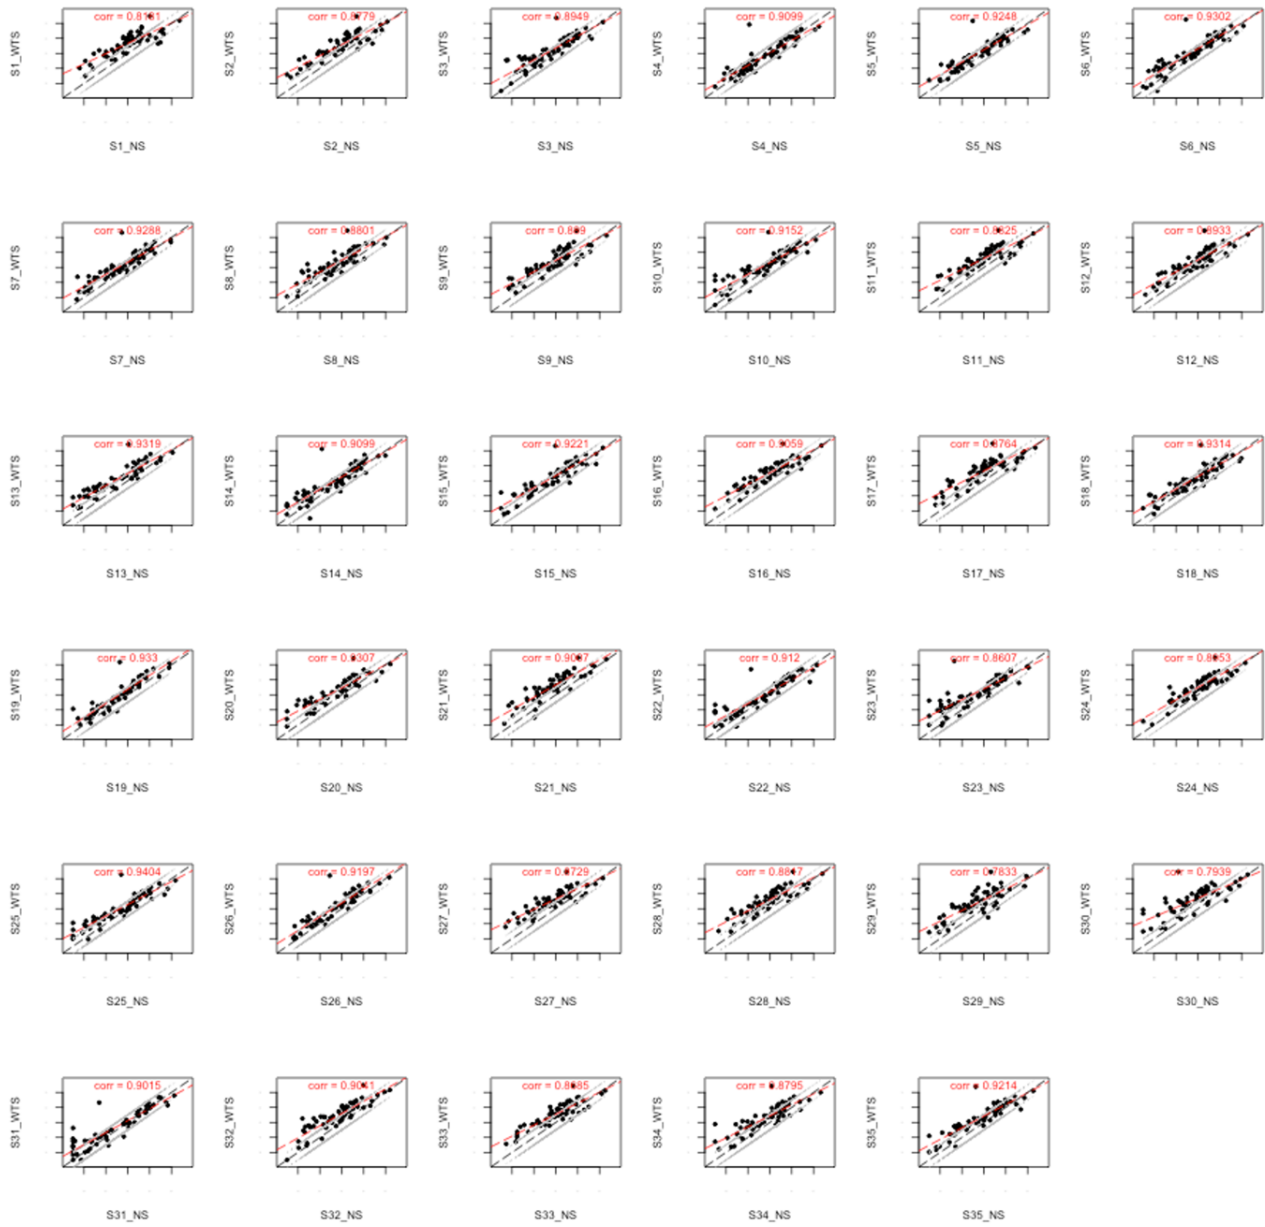

NS to WTS all

B

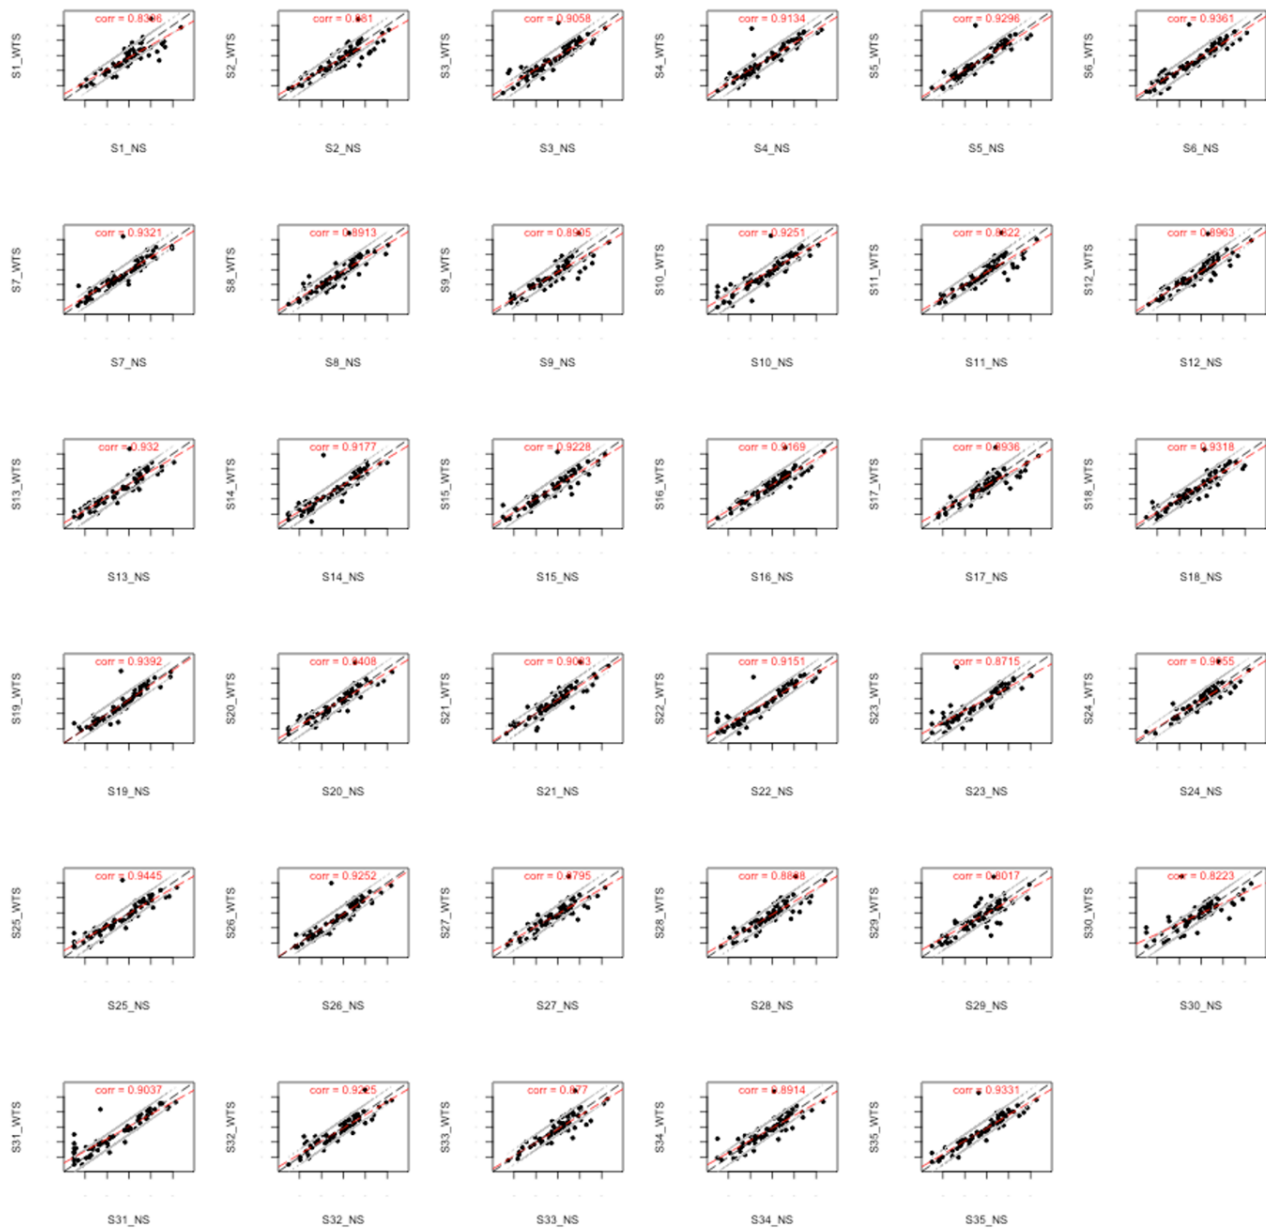

NS to WTS part

C

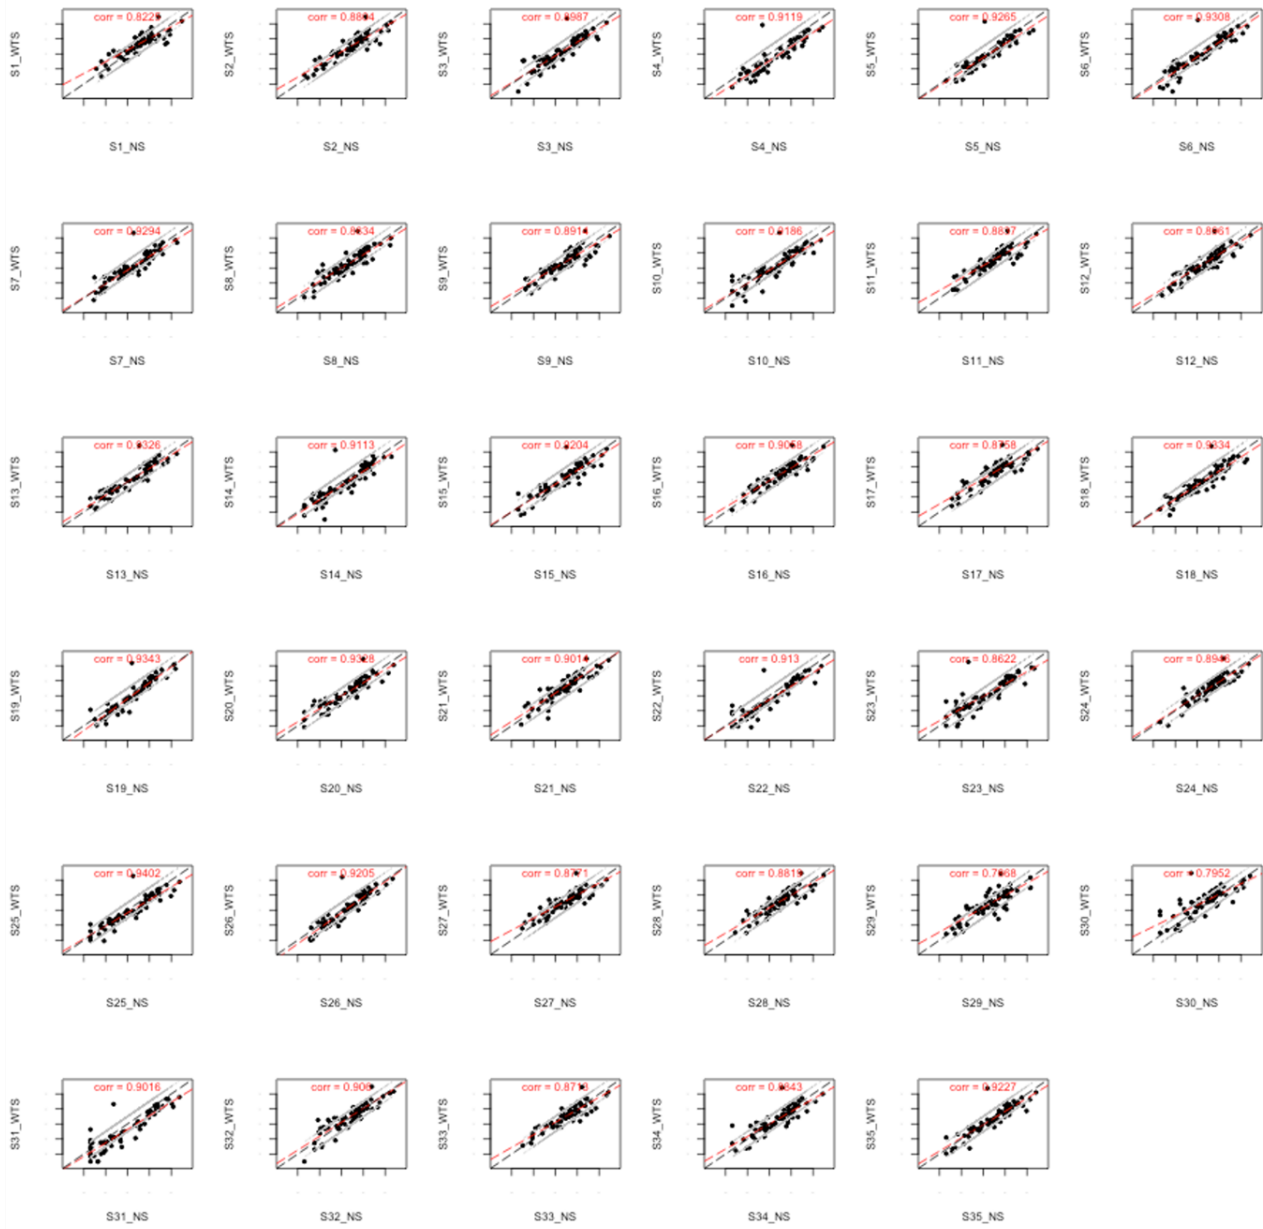

NS Skewed to WTS all

D

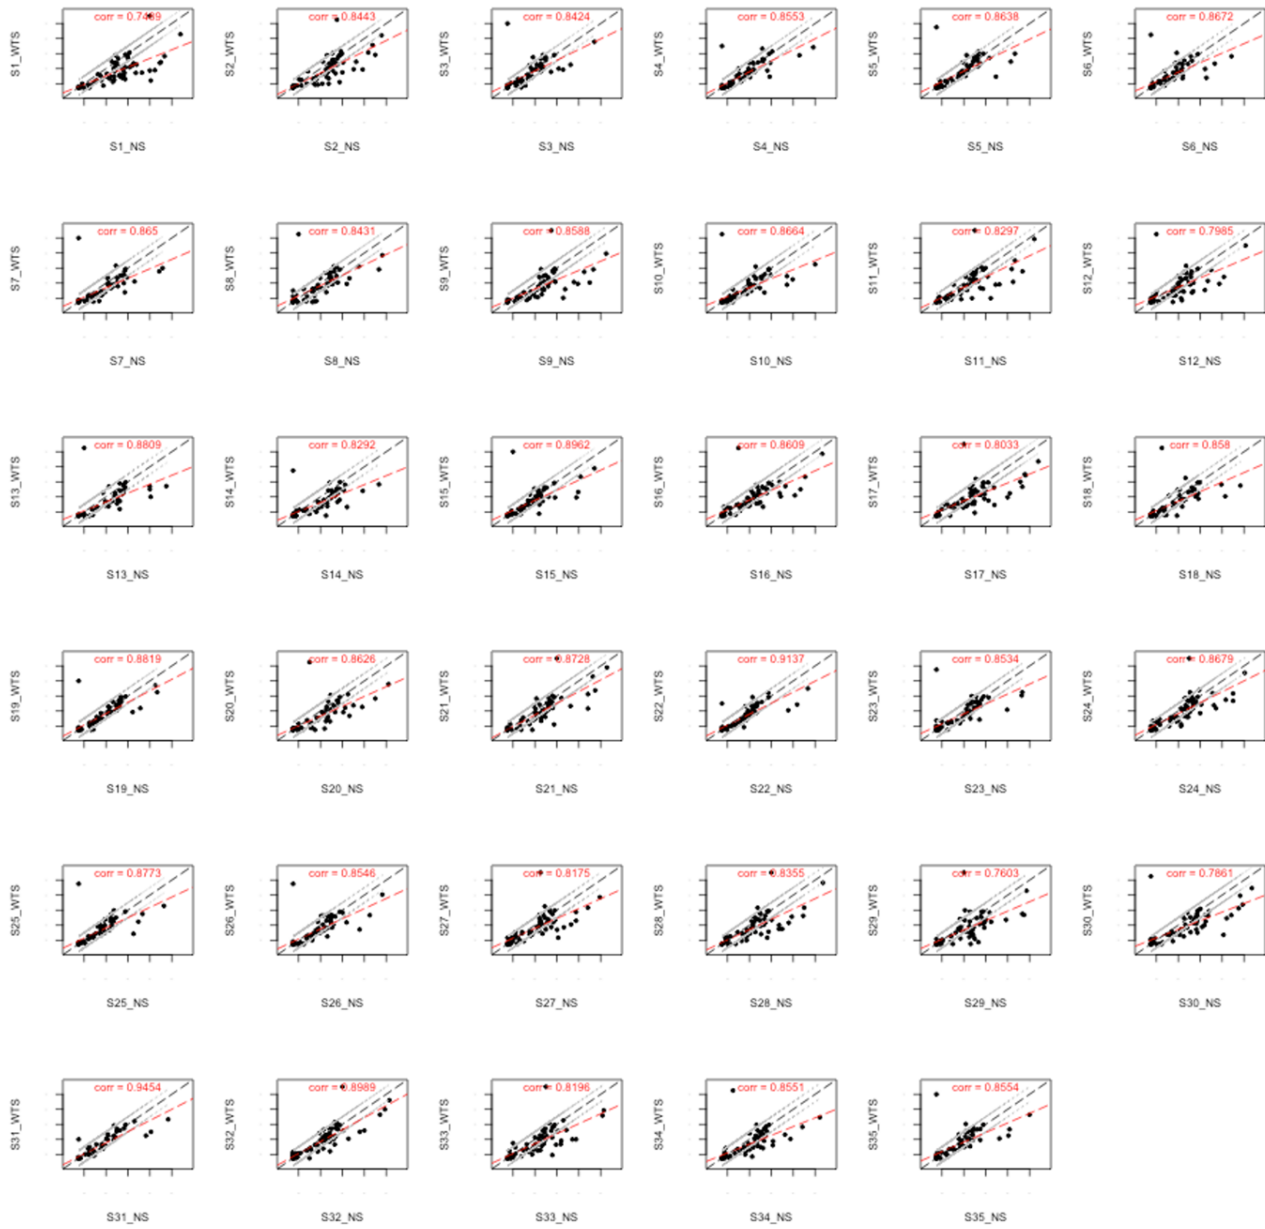

NS to WTS HK

E

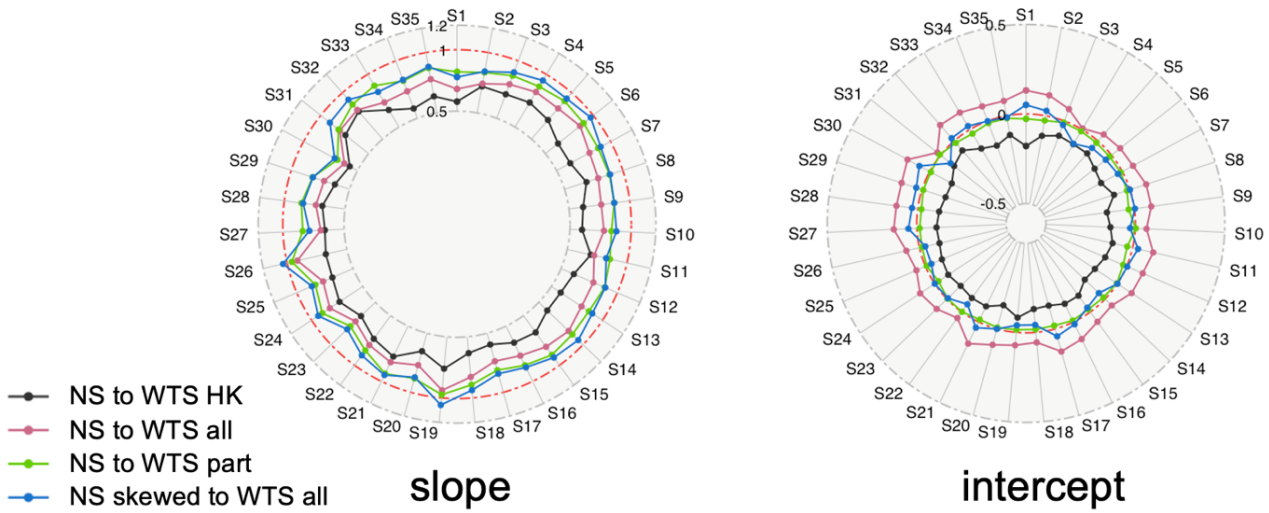

**Figure S8. Linear regression plots for 35 overlapping samples based on all 63 overlapping signatures.** Each dot is a signature’s *singscore*. The x-axis is *singscores* from NanoString platform and y-axis is *singscores* from WTS platform. The red dotting line is the fitted linear regression line. The diagonal black dotted line represents the *singscores* from two platforms are identical which has  $r^2 = \text{slope} = 1$  and intercept = 0. The signature locating in the area between two grey lines is considered as “consistent *singscores*”, which means absolute cross-platform difference in the signature is smaller than 0.1. **(A)** between the “No stable gene” method on NanoString to the “all” method on WTS. **(B)** between the “No stable gene” method on NanoString to the “part” method on WTS. **(C)** between the “Skewed ranks” method on NanoString to the “all” method on WTS. **(D)** between the “HK genes” method on NanoString to the “HK genes” method on WTS. **(E)** Radar plots of linear regression coefficients (slope and intercept) of 35 overlapping samples (S1-35). The format of plots is same to Fig. 5A.



A

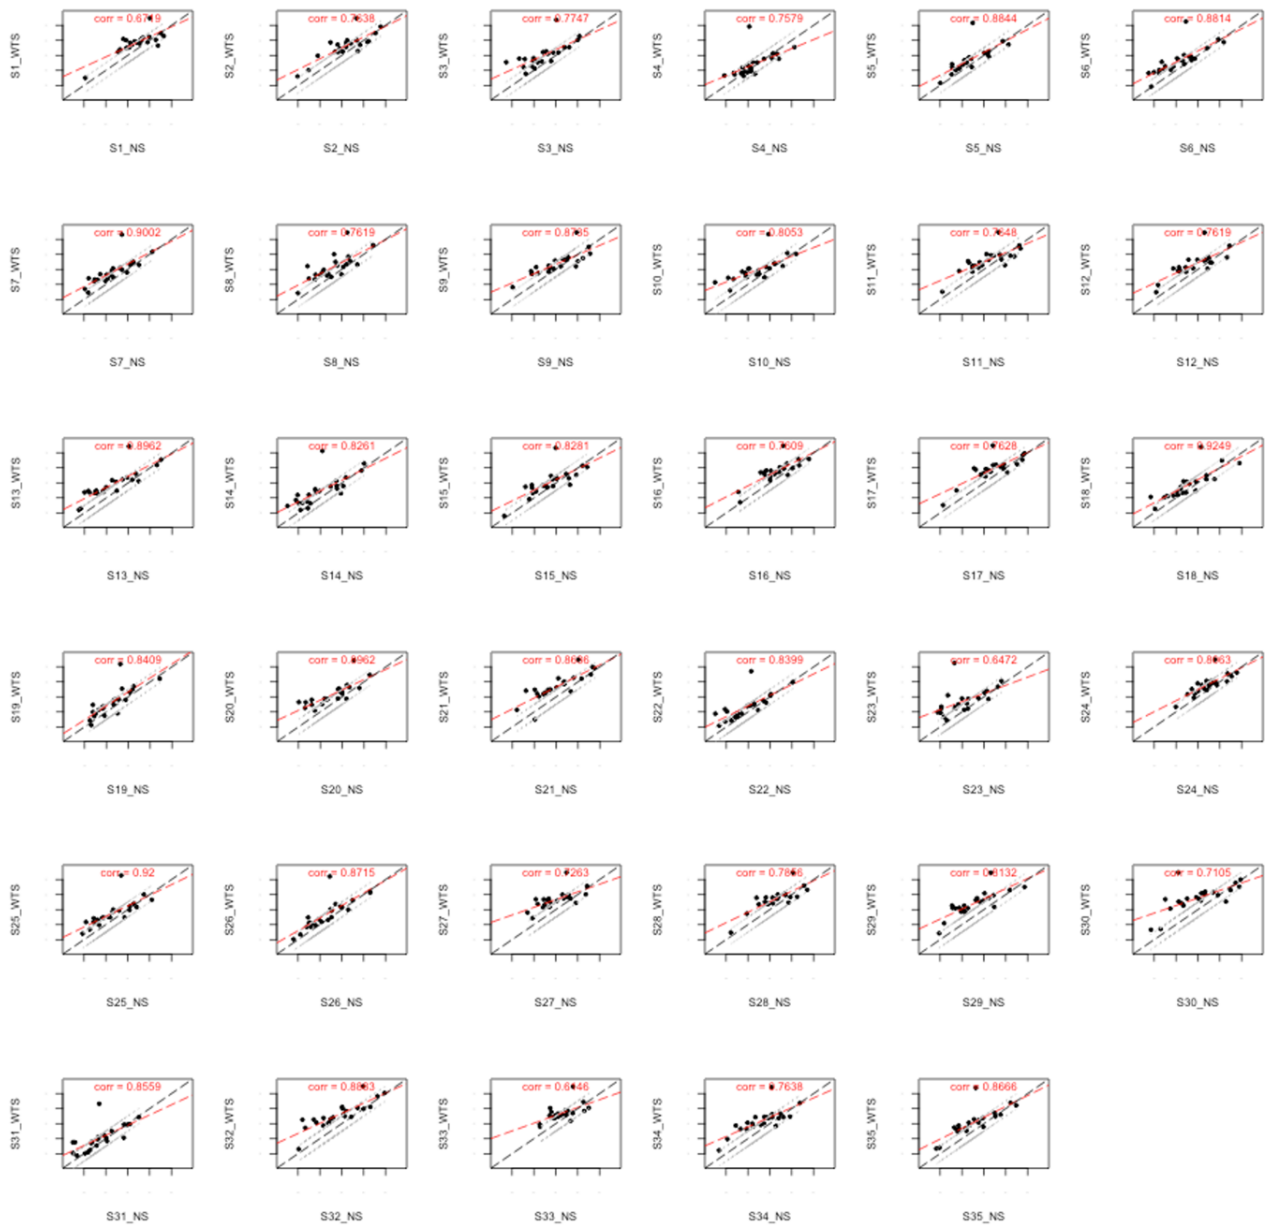

NS to WTS all

B

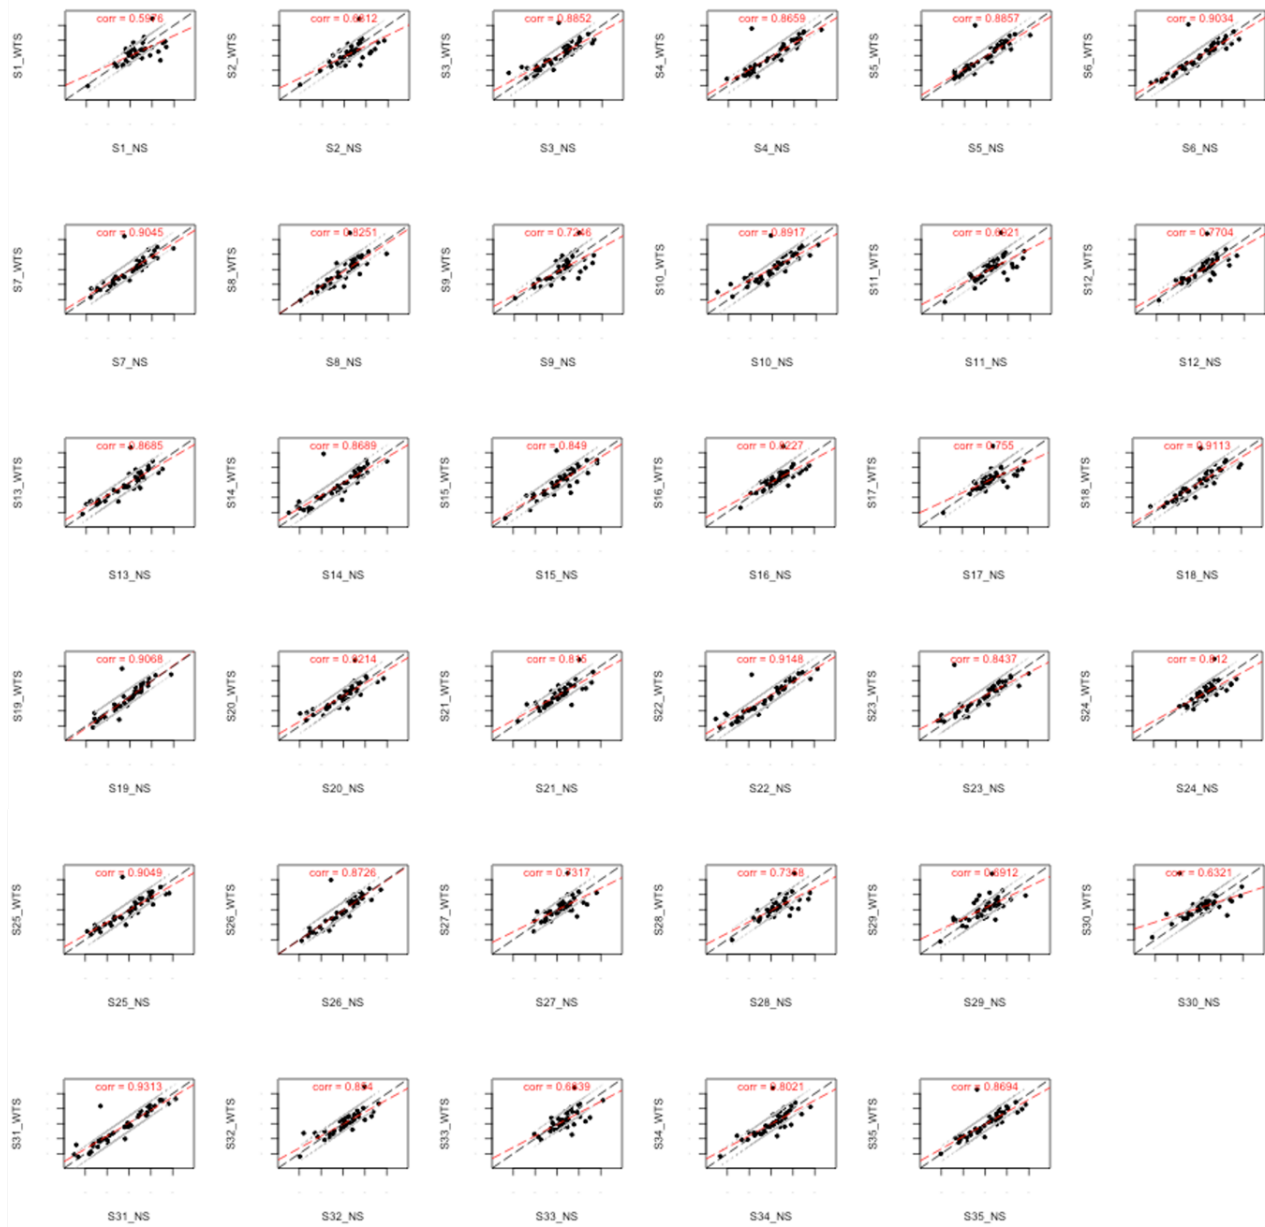

NS to WTS part

C

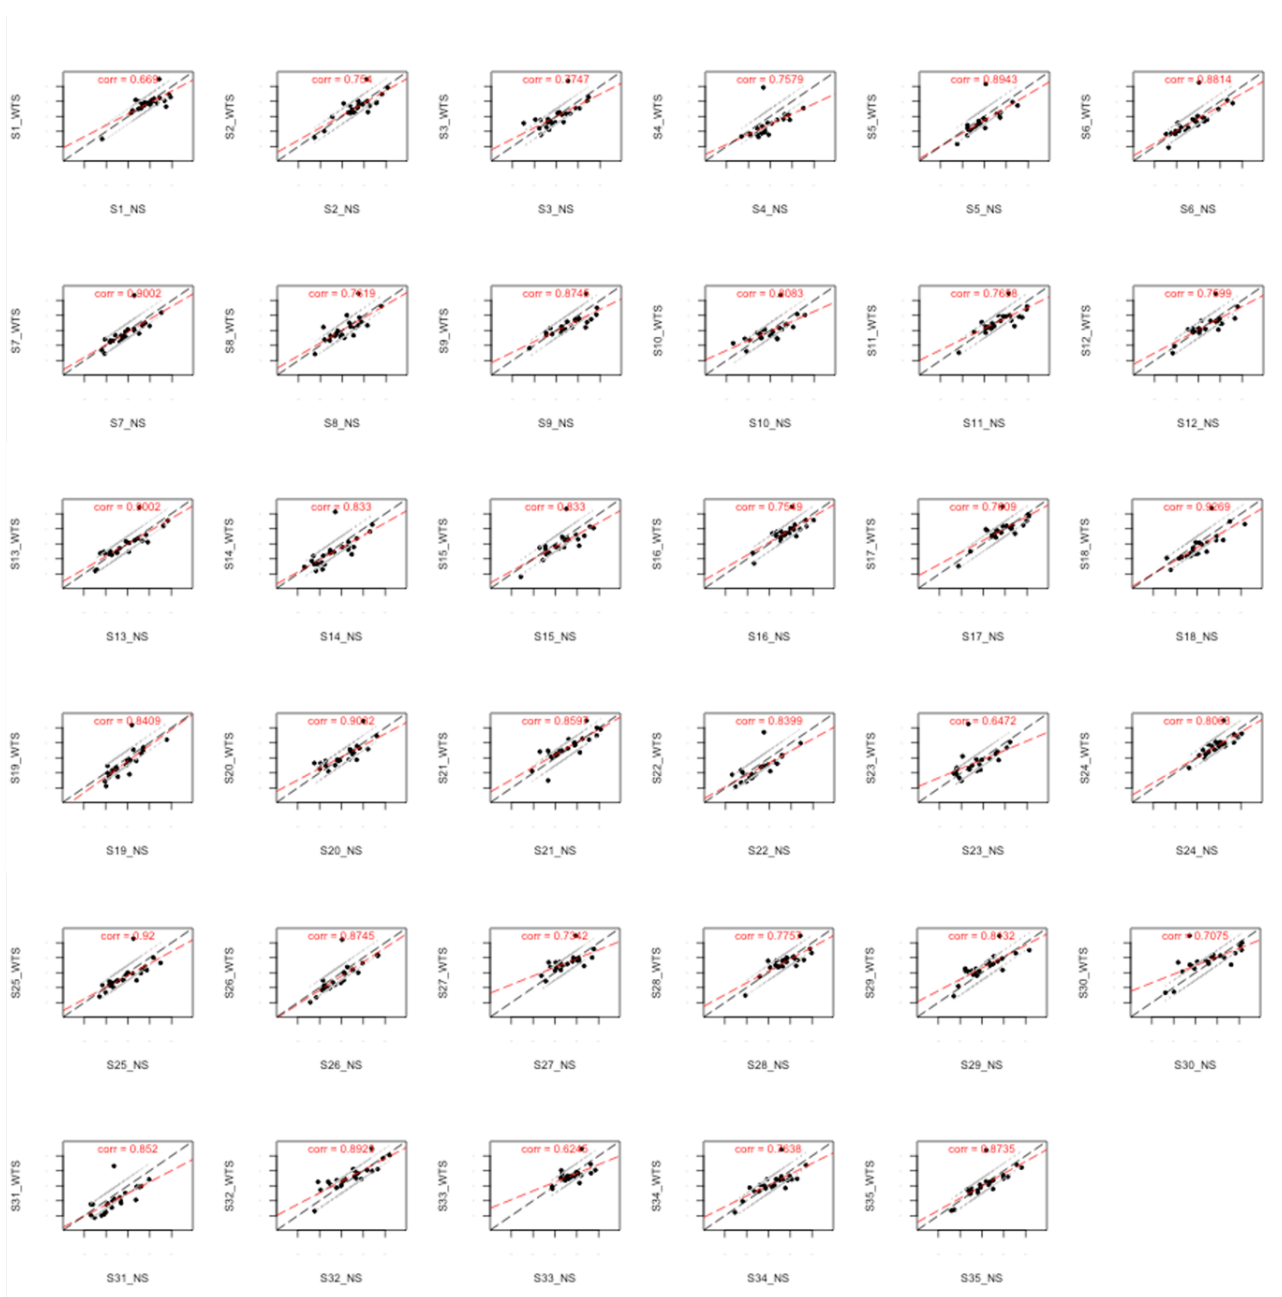

NS Skewed to WTS all

D

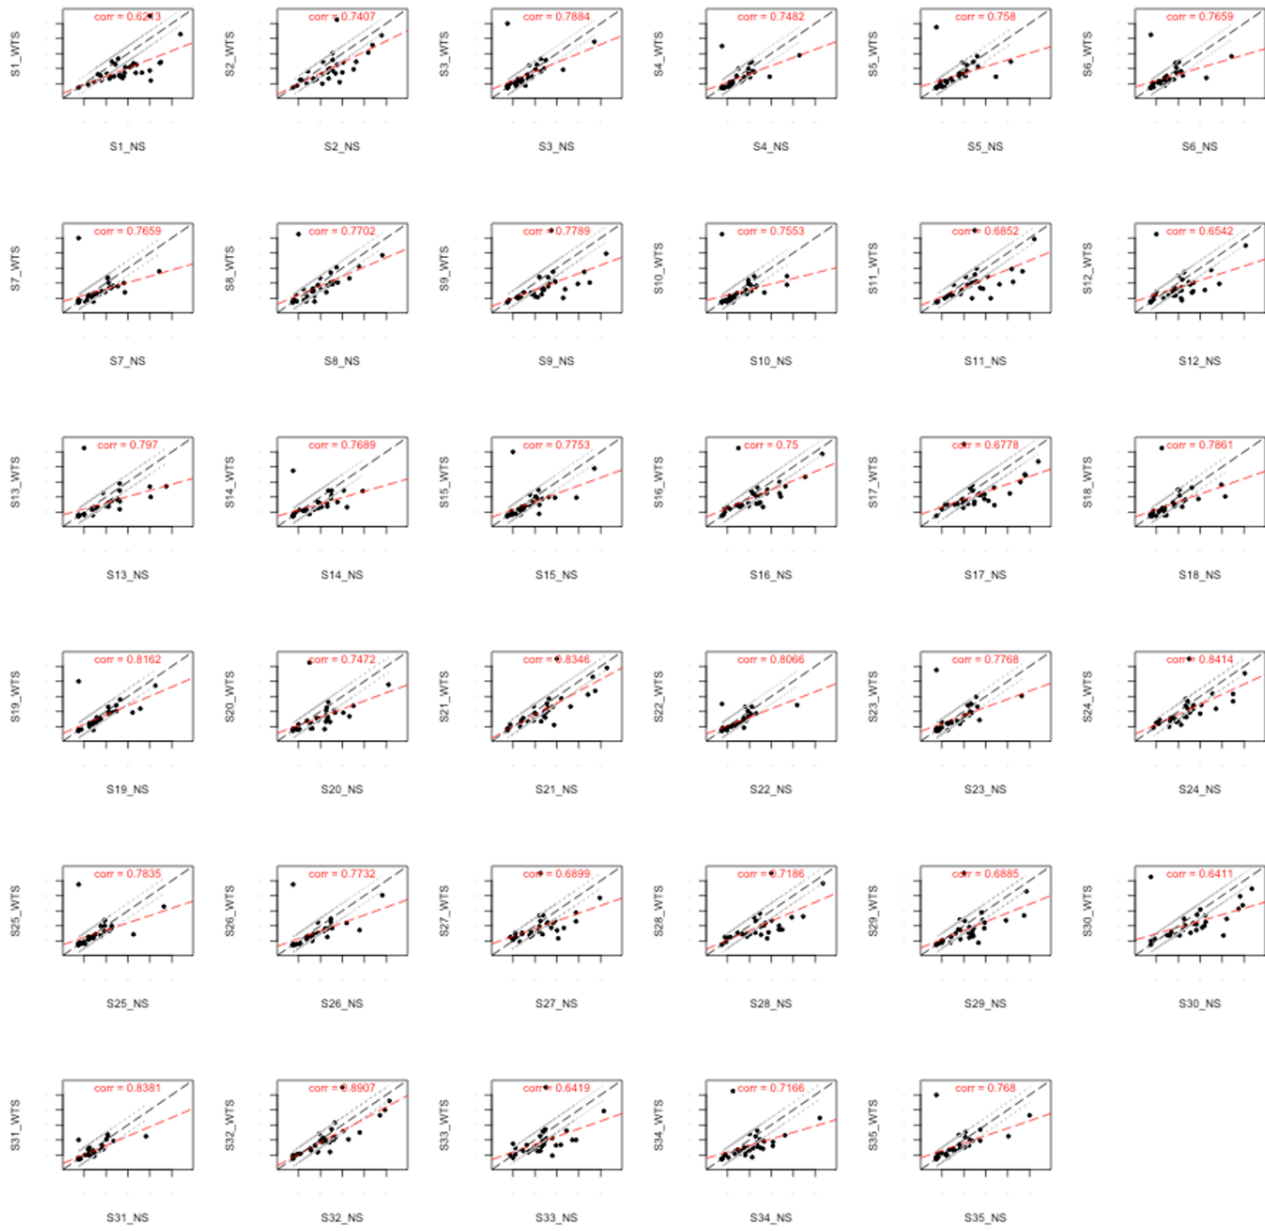

NS to WTS HK

E

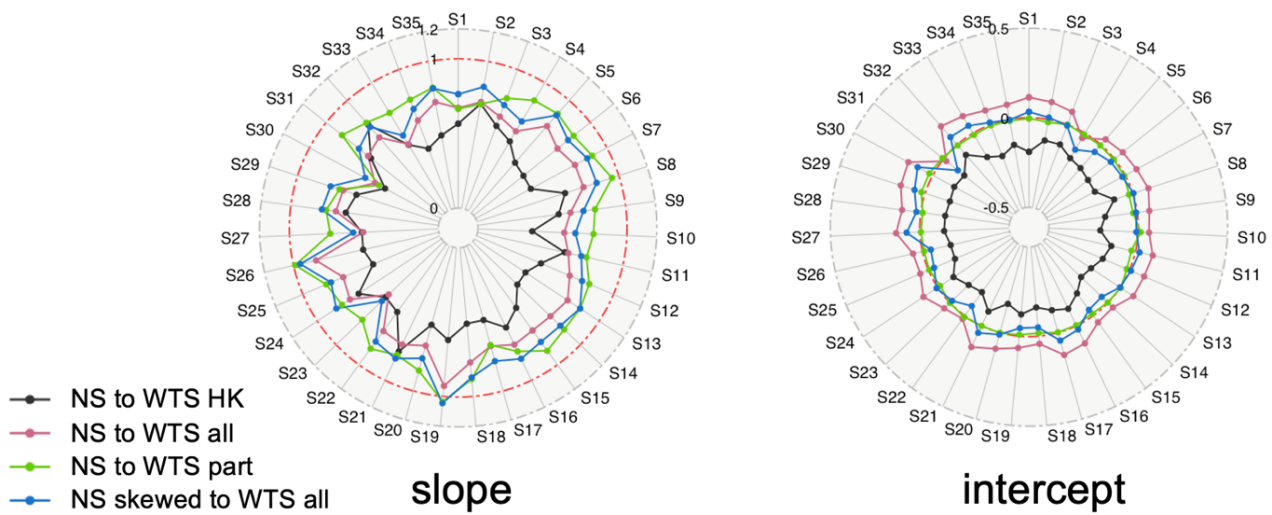

**Figure S9. Linear regression plots for 35 overlapping samples based on highly correlated signatures only.** Similar to the Fig. S8, but only the signatures with  $r \geq 0.8$  were selected in each comparison. **(A)** between the “No stable gene” method in NanoString to the “all” method in WTS with 23 signatures included. **(B)** between the “No stable gene” method in NanoString to the “part” method in WTS with 40 signatures included. **(C)** between the “Skewed ranks” method in NanoString to the “all” method in WTS with 23 signatures included. **(D)** between the “HK genes” method in NanoString to the “HK genes” with 31 signatures included. **(E)** Radar plots of linear regression coefficients (slope and intercept) of 35 overlapping samples (S1-35). The format of plots is same to Fig. 5B.

A

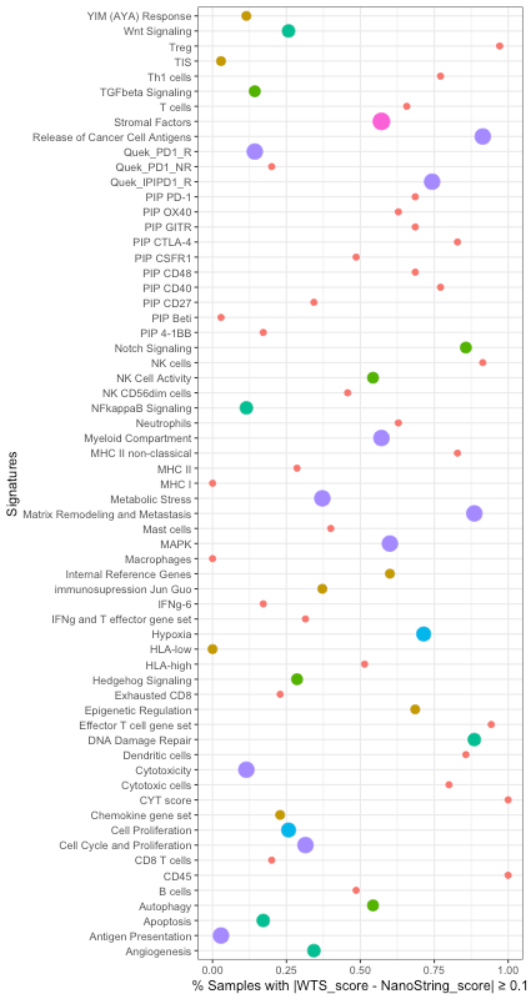

B

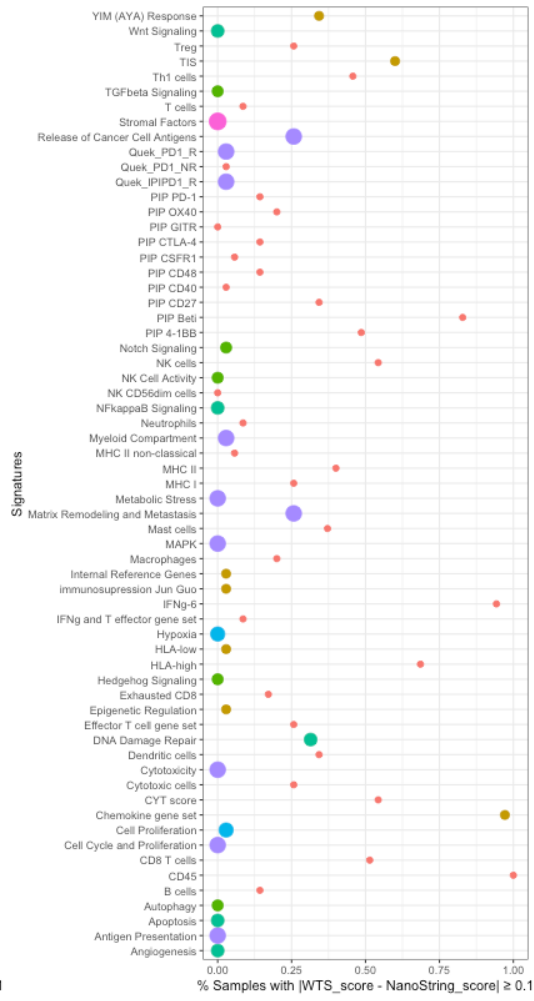

C

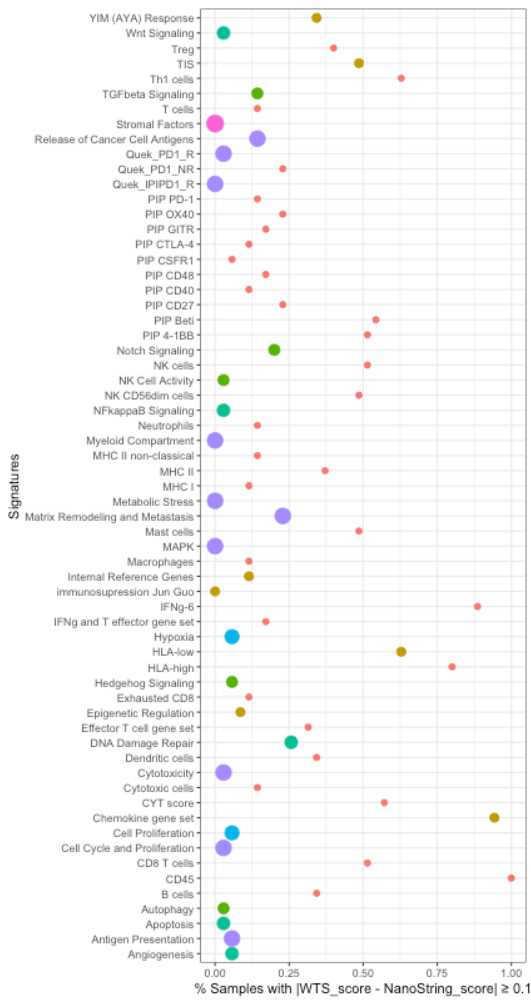

D

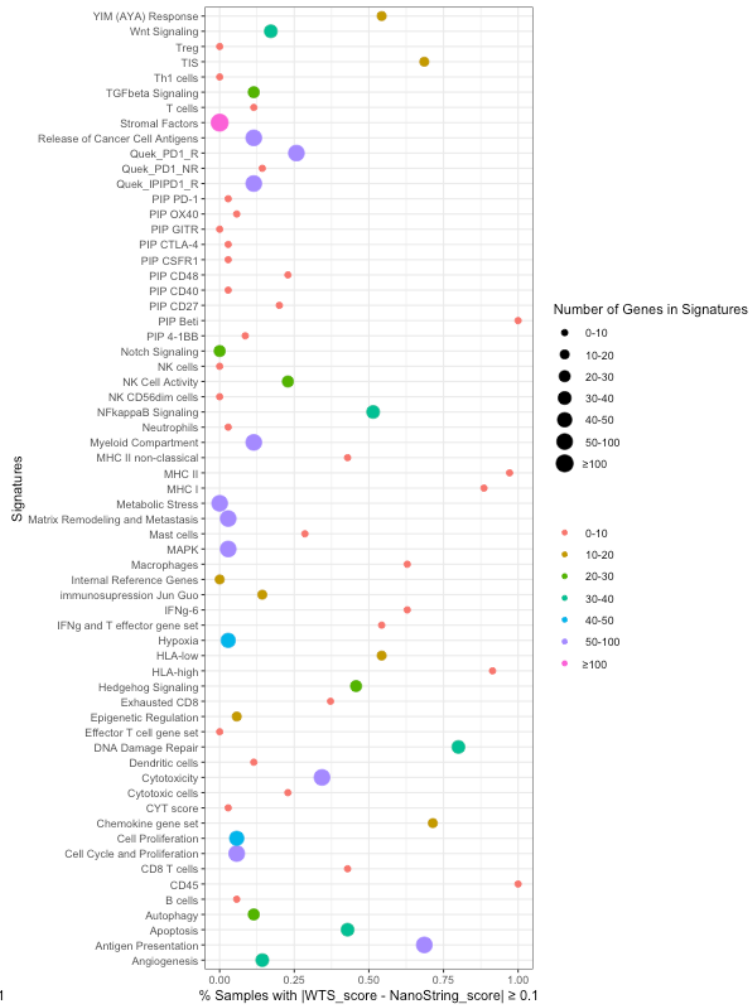

**Figure S10. Cross-platform *singscores* consistency from the signature level.** The x-axis is the percentage of overlapping samples displays absolute cross-platform *singscores* difference  $\geq 0.1$ . **(A)** between the “No stable gene” method in NanoString to the “all” method in WTS. **(B)** between the “No stable gene” method in NanoString to the “part” method in WTS. **(C)** between the “Skewed ranks” method in NanoString to the “all” method in WTS. **(D)** between the “HK genes” method in NanoString to the “HK genes” in WTS.

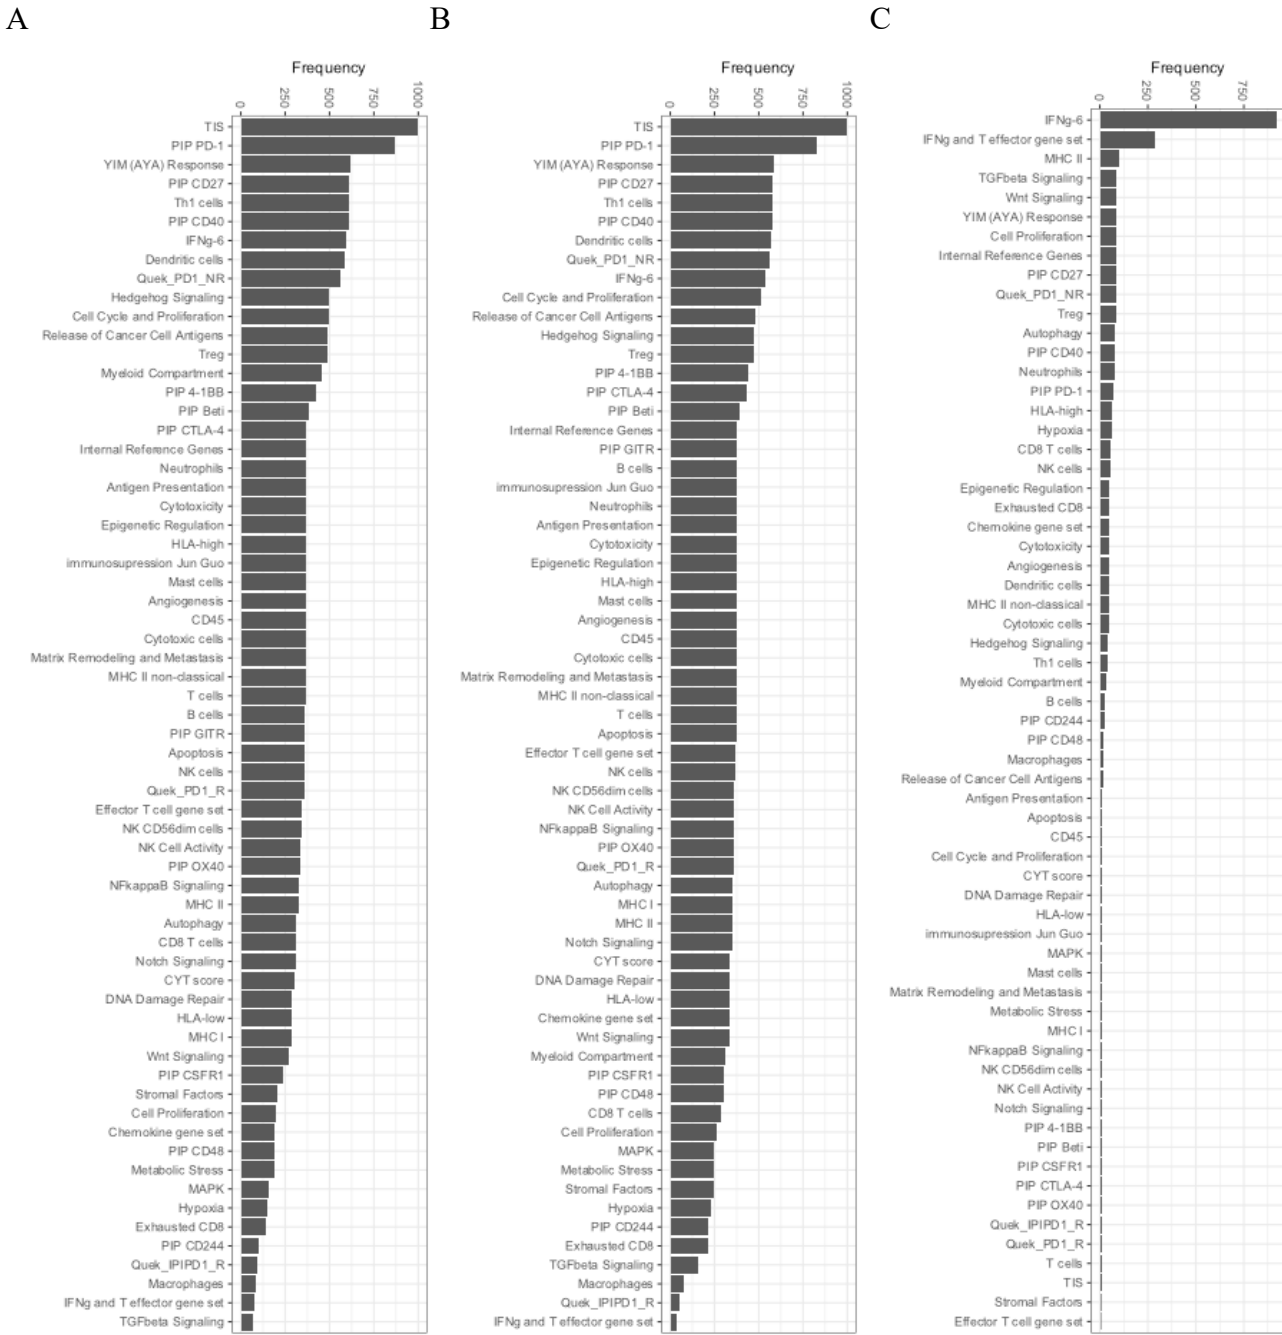

**Figure S11. Frequency of non-zero coefficients.** These bar plots show the frequency of each non-zero coefficients in 1000 times LASSO regressions. In each repeat, the non-zero coefficients were recorded under the  $\lambda$  value that provided the highest mean AUC in 10-fold CV LASSO regression. The 126 training samples used *singsocres* from the (A) “No stable gene” method, (B) “Skewed ranks” method, and (C) “HK genes” method.
